# Supplementary material for: Applying a proteogenomic approach for improving genome annotation in Leishmania panamensis using high-resolution mass spectrometry data
Source: Research Square preprint supplement (doi:10.21203/rs.3.rs-8015195/v1), 2025-11-20
Supplement: Supplementary file 1 [file f6529618dcad8feecaaccb0c.xlsx]

## Sheet: Sheet1
Chowdhury et al. (2025). Identification of N-terminal extension protein in Leishmania panamensis using a proteogenomics approach. Supplementary Table 1: N-terminal extension protein-coding genes in Leishmania panamensis
Note: Peptide-level evidence for these proteins is visualised in Supplementary Figure 2.
Peptide sequence	# PSMs	Master Protein Accessions	Positions in Master Proteins	L. panamensis orthologs	Other Leishmania species orthologs	Category	Description
SDVHSNYGHHGR	2	LpaL13_35_+_1466086-1470816_ORF4301	LpaL13_35_+_1466086-1470816_ORF4301 [117-128]	Leishmania_panamensis_strain_MHOM/PA/94/PSC-1 (1534/1535 (99%))	Leishmania_braziliensis_MHOM/BR/75/M2904_2019 (1510/1535 (98%))	N-terminal extension	Zinc carboxypeptidase
VYAASTSPPLSASAEAASAR	1	LpaL13_35_+_1466086-1470816_ORF4301	LpaL13_35_+_1466086-1470816_ORF4301 [245-264]
SLQHDTPSFITVAR	4	LpaL13_35_+_1466086-1470816_ORF4301	LpaL13_35_+_1466086-1470816_ORF4301 [311-324]
TNVPSFSALQTSAR	1	LpaL13_35_+_1466086-1470816_ORF4301	LpaL13_35_+_1466086-1470816_ORF4301 [65-78]
LLLQQQLQAEGVVK	2	LpaL13_35_+_1466086-1470816_ORF4301	LpaL13_35_+_1466086-1470816_ORF4301 [101-114]
EAHPCDASVPR	2	LpaL13_35_+_1466086-1470816_ORF4301	LpaL13_35_+_1466086-1470816_ORF4301 [265-275]
DSLASGVTTPGR	2	LpaL13_35_+_1466086-1470816_ORF4301	LpaL13_35_+_1466086-1470816_ORF4301 [233-244]
VNAAGGLDGSGTPR	1	LpaL13_35_+_1466086-1470816_ORF4301	LpaL13_35_+_1466086-1470816_ORF4301 [79-92]
KSQTFSTAADNQTQVGIK	3	LpaL13_30_-_831090-831917_ORF1204	LpaL13_30_-_831090-831917_ORF1204 [58-75]	Leishmania_panamensis_strain_MHOM/PA/94/PSC-1 (239/240 (99%))	Leishmania_braziliensis_MHOM/BR/75/M2903 (238/240 (99%))	N-terminal extension	Heat Shock Protein 70 Partial
SQTFSTAADNQTQVGIK	13	LpaL13_30_-_831090-831917_ORF1204	LpaL13_30_-_831090-831917_ORF1204 [59-75]
GLVLLDVTPLSLGIETLGGVFTRMIPK	5	LpaL13_30_-_831090-831917_ORF1204	LpaL13_30_-_831090-831917_ORF1204 [24-50]
GLVLLDVTPLSLGIETLGGVFTR	3	LpaL13_30_-_831090-831917_ORF1204	LpaL13_30_-_831090-831917_ORF1204 [24-46]
CNMQVCPERFK	8	LpaL13_34_+_1586593-1587510_ORF4535	LpaL13_34_+_1586593-1587510_ORF4535 [38-48]	Leishmania_panamensis_strain_MHOM/PA/94/PSC-1 (289/290 (99%))	Leishmania_braziliensis_MHOM/BR/75/M2904_2019 (288/290 (99%))	N-terminal extension	Mitochondrial phosphate transporter
CIGGGILACGTTHTAVCPLDVVK	9	LpaL13_34_+_1586593-1587510_ORF4535	LpaL13_34_+_1586593-1587510_ORF4535 [15-37]
CNMQVCPER	2	LpaL13_34_+_1586593-1587510_ORF4535	LpaL13_34_+_1586593-1587510_ORF4535 [38-46]
GVPQSDGERLSWVNSHVK	4	LpaL13_23_+_503803-505170_ORF1336	LpaL13_23_+_503803-505170_ORF1336 [41-58]	Leishmania_panamensis_strain_MHOM/PA/94/PSC-1 (454/455 (99%))	Leishmania_braziliensis_MHOM/BR/75/M2903 (452/455 (99%))	N-terminal extension	Ribosomal protein S9/S16
RTQDMELSR	2	LpaL13_23_+_503803-505170_ORF1336	LpaL13_23_+_503803-505170_ORF1336 [59-67]
MMPLEVGDNAVITNNQATHGNLFHFR	2	LpaL13_23_+_503803-505170_ORF1336	LpaL13_23_+_503803-505170_ORF1336 [76-101]
LANSLASQK	2	LpaL13_23_+_503803-505170_ORF1336	LpaL13_23_+_503803-505170_ORF1336 [32-40]
AQTSTTATGASSSAK	2	LpaL13_20_-_684084-690350_ORF2930	LpaL13_20_-_684084-690350_ORF2930 [148-162]	Leishmania panamensis MHOM/COL/81/L13_LPAL13_200022900	Leishmania braziliensis MHOM/BR/75/M2904 2019_LbrM.20.2.001570	N-terminal extension	Hypothetical protein
HVVMDPLAALR	3	LpaL13_20_-_684084-690350_ORF2930	LpaL13_20_-_684084-690350_ORF2930 [223-233]
SLSILPILPHR	5	LpaL13_20_-_684084-690350_ORF2930	LpaL13_20_-_684084-690350_ORF2930 [198-208]
HLCPLPLLSR	3	LpaL13_20_-_684084-690350_ORF2930	LpaL13_20_-_684084-690350_ORF2930 [163-172]
FAELEDYSNTLPFK	2	LpaL13_18_+_358131-360905_ORF1054	LpaL13_18_+_358131-360905_ORF1054 [27-40]		Leishmania braziliensis MHOM/BR/75/M2904 2019_LbrM.18.2.001170	N-terminal extension	Vacuolar protein sorting-associated protein 16
ELSLPQSIR	1	LpaL13_18_+_358131-360905_ORF1054	LpaL13_18_+_358131-360905_ORF1054 [173-181]
LVLVHLGRQK	1	LpaL13_18_+_358131-360905_ORF1054	LpaL13_18_+_358131-360905_ORF1054 [158-167]
LVLVHLGR	2	LpaL13_18_+_358131-360905_ORF1054	LpaL13_18_+_358131-360905_ORF1054 [158-165]
LLWQFSSK	2	LpaL13_27_-_456660-458705_ORF1463	LpaL13_27_-_456660-458705_ORF1463 [80-87]	Leishmania panamensis MHOM/COL/81/L13_LPAL13_270018100	Leishmania braziliensis MHOM/BR/75/M2904 2019_LbrM.27.2.001190	N-terminal extension	Hypothetical protein; domain: signal peptide
HLVLCVR	1	LpaL13_27_-_456660-458705_ORF1463	LpaL13_27_-_456660-458705_ORF1463 [91-97]
RTAVVDGAPR	1	LpaL13_27_-_456660-458705_ORF1463	LpaL13_27_-_456660-458705_ORF1463 [127-136]
SVTPFPAR	2	LpaL13_27_-_456660-458705_ORF1463	LpaL13_27_-_456660-458705_ORF1463 [72-79]
HTEMYDGYTDDFGVFK	3	LpaL13_08_+_93310-94620_ORF233	LpaL13_08_+_93310-94620_ORF233 [100-115]	Leishmania panamensis MHOM/COL/81/L13_LPAL13_080007700	Leishmania braziliensis MHOM/BR/75/M2904 2019_LbrM.08.0320	N-terminal extension	Ribosomal protein L2
QGSQHYGLEPK	2	LpaL13_08_+_93310-94620_ORF233	LpaL13_08_+_93310-94620_ORF233 [79-89]
LVNPIGK	3	LpaL13_08_+_93310-94620_ORF233	LpaL13_08_+_93310-94620_ORF233 [72-78]
RDILVSYLIPQALQLHTERLK	1	LpaL13_10_+_179469-181394_ORF383	LpaL13_10_+_179469-181394_ORF383 [62-82]	Leishmania panamensis MHOM/COL/81/L13_LPAL13_100010200		N-terminal extension	GP63, leishmanolysin
IAVSTADLTDLCSHCTR	5	LpaL13_10_+_179469-181394_ORF383	LpaL13_10_+_179469-181394_ORF383 [20-36]
ATSGINAWGTAVQK	2	LpaL13_34_+_396573-398291_ORF939	LpaL13_34_+_396573-398291_ORF939 [15-28]		Leishmania_braziliensis_MHOM/BR/75/M2904 (541/570 (95%))	N-terminal extension	NADH-dependent fumarate reductase
APDNPDGTPLPIGFTIVR	1	LpaL13_34_+_396573-398291_ORF939	LpaL13_34_+_396573-398291_ORF939 [95-112]
LISLMHSK	2	LpaL13_34_+_396573-398291_ORF939	LpaL13_34_+_396573-398291_ORF939 [134-141]
ALENYIR	1	LpaL13_34_+_396573-398291_ORF939	LpaL13_34_+_396573-398291_ORF939 [113-119]
ETRLGGNSAK	1	LpaL13_34_+_396573-398291_ORF939	LpaL13_34_+_396573-398291_ORF939 [5-14]
VGEVEEMLSCCK	1	LpaL13_32_-_844828-846651_ORF1931	LpaL13_32_-_844828-846651_ORF1931 [96-107]	Leishmania panamensis MHOM/COL/81/L13_LPAL13_320029400	Leishmania braziliensis MHOM/BR/75/M2903_LBRM2903_320031300	N-terminal extension	Hypothetical protein
HTEVTNEK	2	LpaL13_32_-_844828-846651_ORF1931	LpaL13_32_-_844828-846651_ORF1931 [82-89]
ELNVLR	2	LpaL13_32_-_844828-846651_ORF1931	LpaL13_32_-_844828-846651_ORF1931 [42-47]
APVVPSEAEEPSCMLPVTK	8	LpaL13_28_-_1120925-1122349_ORF1	LpaL13_28_-_1120925-1122349_ORF1 [84-102]	Leishmania_panamensis_strain_MHOM/PA/94/PSC-1 (403/405 (99%))	Leishmania_braziliensis_MHOM/BR/75/M2904 (383/425 (90%))	N-terminal extension	Hypothetical protein
TTFVHESSGDGPLEDAGR	2	LpaL13_28_-_1120925-1122349_ORF1	LpaL13_28_-_1120925-1122349_ORF1 [40-57]
ASVRSDCWPCAK	3	LpaL13_28_-_1120925-1122349_ORF1	LpaL13_28_-_1120925-1122349_ORF1 [27-38]
LSVCGEHR	3	LpaL13_28_-_1120925-1122349_ORF1	LpaL13_28_-_1120925-1122349_ORF1 [71-78]
GPHLNGK	1	LpaL13_28_-_1120925-1122349_ORF1	LpaL13_28_-_1120925-1122349_ORF1 [20-26]
QIQQLQSENLYTAASCENIRK	2	LpaL13_30_+_236168-237055_ORF783	LpaL13_30_+_236168-237055_ORF783 [144-164]	Leishmania panamensis strain MHOM/PA/94/PSC-1_LPMP_300770	Leishmania braziliensis MHOM/BR/75/M2904 2019_LbrM.30.2.000830	N-terminal extension	Heat shock protein grpe
YEVLRAQLRESK	1	LpaL13_30_+_236168-237055_ORF783	LpaL13_30_+_236168-237055_ORF783 [131-142]
QAQLLQQEQQSATTADELLAK	5	LpaL13_26_+_732918-734111_ORF1939	LpaL13_26_+_732918-734111_ORF1939 [198-218]	Leishmania panamensis MHOM/COL/81/L13_LPAL13_260025200	Leishmania martiniquensis LEM2494_LMARLEM2494_260025000	N-terminal extension	Hypothetical protein
VPDEPWGCTPTPIDISAAR	3	LpaL13_26_+_732918-734111_ORF1939	LpaL13_26_+_732918-734111_ORF1939 [154-172]		Leishmania martiniquensis MHOM/TH/2012/LSCM1_LSCM1_04222
STQGVTDSSSLPR	1	LpaL13_35_-_1965210-1969598_ORF1643	LpaL13_35_-_1965210-1969598_ORF1643 [61-73]	Leishmania_panamensis_strain_MHOM/PA/94/PSC-1 (1400/1419 (99%))	Leishmania_braziliensis_MHOM/BR/75/M2904_2019 (1416/1468 (96%))	N-terminal extension	Hypothetical protein
VQTFYIAPRPPNR	1	LpaL13_35_-_1965210-1969598_ORF1643	LpaL13_35_-_1965210-1969598_ORF1643 [38-50]
HLLDAHGGHR	1	LpaL13_35_-_1965210-1969598_ORF1643	LpaL13_35_-_1965210-1969598_ORF1643 [51-60]
RAPGQLPLPAVR	1	LpaL13_35_-_1965210-1969598_ORF1643	LpaL13_35_-_1965210-1969598_ORF1643 [74-85]
APGQLPLPAVR	2	LpaL13_35_-_1965210-1969598_ORF1643	LpaL13_35_-_1965210-1969598_ORF1643 [75-85]
FQQQPESQEIEHTAVAQQGR	2	LpaL13_26_-_218092-219789_ORF2277	LpaL13_26_-_218092-219789_ORF2277 [56-75]	Leishmania_panamensis_strain_MHOM/PA/94/PSC-1 (564/565 (99%))	Leishmania_braziliensis_MHOM/BR/75/M2904_2019 (544/565 (96%))	N-terminal extension	Hypothetical protein
GDHQAPIAELFASR	1	LpaL13_26_-_218092-219789_ORF2277	LpaL13_26_-_218092-219789_ORF2277 [216-229]
MEHSHSQRVSYDMPQK	1	LpaL13_26_-_218092-219789_ORF2277	LpaL13_26_-_218092-219789_ORF2277 [1-16]
STLVSYDPR	1	LpaL13_26_-_218092-219789_ORF2277	LpaL13_26_-_218092-219789_ORF2277 [230-238]
MEHSHSQR	1	LpaL13_26_-_218092-219789_ORF2277	LpaL13_26_-_218092-219789_ORF2277 [1-8]
SAEPCQYTSSLTADR	1	LpaL13_29_-_630025-633447_ORF1063	LpaL13_29_-_630025-633447_ORF1063 [185-199]	Leishmania panamensis MHOM/COL/81/L13_LPAL13_290020700	Leishmania_braziliensis_MHOM/BR/75/M2903 (1095/1140 (96%))	N-terminal extension	Hypothetical protein
TPRPTSSLVDHQTR	3	LpaL13_29_-_630025-633447_ORF1063	LpaL13_29_-_630025-633447_ORF1063 [230-243]		Leishmania tropica L590_LTRL590_290022900
SSLCNASLASENNR	1	LpaL13_29_-_630025-633447_ORF1063	LpaL13_29_-_630025-633447_ORF1063 [155-168]		Leishmania aethiopica L147_LAEL147_000532600
FAPAWLAGK	3	LpaL13_29_-_630025-633447_ORF1063	LpaL13_29_-_630025-633447_ORF1063 [205-213]
GSMSSTVR	1	LpaL13_29_-_630025-633447_ORF1063	LpaL13_29_-_630025-633447_ORF1063 [369-376]
HLSGMAWISAIDTASTK	4	LpaL13_22_-_72651-73886_ORF1271	LpaL13_22_-_72651-73886_ORF1271 [67-83]	Leishmania_panamensis_strain_MHOM/PA/94/PSC-1 (411/411 (100%))	Leishmania_braziliensis_MHOM/BR/75/M2904_2019 (404/411 (98%))	N-terminal extension	Zinc finger C-x8-C-x5-C-x3-H type
SFTHHFASHSSLPTVR	1	LpaL13_22_-_72651-73886_ORF1271	LpaL13_22_-_72651-73886_ORF1271 [2-17]
VGSASNFMPTGSYGNR	3	LpaL13_22_-_72651-73886_ORF1271	LpaL13_22_-_72651-73886_ORF1271 [18-33]
APQPLLTVSK	3	LpaL13_22_-_72651-73886_ORF1271	LpaL13_22_-_72651-73886_ORF1271 [53-62]
KAEDDFSATR	2	LpaL13_28_+_841341-841934_ORF2395	LpaL13_28_+_841341-841934_ORF2395 [14-23]	Leishmania panamensis MHOM/COL/81/L13_LPAL13_280029700	Leishmania braziliensis MHOM/BR/75/M2904_LbrM.28.2410	N-terminal extension	glycoprotein 96-92
QRAEMVRK	4	LpaL13_28_+_841341-841934_ORF2395	LpaL13_28_+_841341-841934_ORF2395 [43-50]
QRAEMVR	1	LpaL13_28_+_841341-841934_ORF2395	LpaL13_28_+_841341-841934_ORF2395 [43-49]
VATTGAPAPTSHALPSATAAGSAGTPK	3	LpaL13_20_+_335677-338460_ORF760	LpaL13_20_+_335677-338460_ORF760 [214-240]	Leishmania panamensis strain MHOM/PA/94/PSC-1_LPMP_200950	Leishmania braziliensis MHOM/BR/75/M2903_LBRM2903_200015900	N-terminal extension	Hypothetical protein; domain: transmembrane region
HPSPSAPR	2	LpaL13_20_+_335677-338460_ORF760	LpaL13_20_+_335677-338460_ORF760 [331-338]
GSCRDSAGRLFSNVK	1	LpaL13_20_+_335677-338460_ORF760	LpaL13_20_+_335677-338460_ORF760 [293-307]
VDMASTR	1	LpaL13_20_+_335677-338460_ORF760	LpaL13_20_+_335677-338460_ORF760 [312-318]
SVPLLLASASGESTSSSPR	1	LpaL13_33_-_51680-56725_ORF4326	LpaL13_33_-_51680-56725_ORF4326 [91-109]	Leishmania panamensis MHOM/COL/81/L13_LPAL13_330007100	Leishmania major strain SD 75.1_LMJSD75_330007500	N-terminal extension	Metallo-peptidase, Clan MC, Family M14
CPAPPTASVSK	2	LpaL13_33_-_51680-56725_ORF4326	LpaL13_33_-_51680-56725_ORF4326 [63-73]		Leishmania aethiopica L147_LAEL147_000666300
DRDSGDGLSTQLR	1	LpaL13_33_-_51680-56725_ORF4326	LpaL13_33_-_51680-56725_ORF4326 [23-35]
THLPYLR	2	LpaL13_33_-_51680-56725_ORF4326	LpaL13_33_-_51680-56725_ORF4326 [84-90]
AQADAEGQRAENGK	10	LpaL13_20_-_249194-250294_ORF4239	LpaL13_20_-_249194-250294_ORF4239 [43-56]; [99-112]	Leishmania panamensis MHOM/COL/81/L13_LPAL13_200011400	Leishmania braziliensis MHOM/BR/75/M2903_LBRM2903_200013300	N-terminal extension	Flagellar attachment zone protein
AQADAEGQR	1	LpaL13_20_-_249194-250294_ORF4239	LpaL13_20_-_249194-250294_ORF4239 [43-51]; [99-107]
AARPIGLTAGARHK	3	LpaL13_17_+_388714-390705_ORF1159	LpaL13_17_+_388714-390705_ORF1159 [73-86]	Leishmania panamensis MHOM/COL/81/L13_LPAL13_170015200	Leishmania braziliensis MHOM/BR/75/M2904 2019_LbrM.17.2.000950	N-terminal extension	Formin Homology 2
HTMEEEEAAAR	1	LpaL13_17_+_388714-390705_ORF1159	LpaL13_17_+_388714-390705_ORF1159 [98-108]
LLALFPK	2	LpaL13_17_+_388714-390705_ORF1159	LpaL13_17_+_388714-390705_ORF1159 [87-93]
LASPSVGAAQLAK	6	LpaL13_20_-_707456-708208_ORF2970	LpaL13_20_-_707456-708208_ORF2970 [74-86]	Leishmania panamensis strain MHOM/PA/94/PSC-1_LPMP_201810	Leishmania braziliensis MHOM/BR/75/M2904 2019_LbrM.20.2.001630	N-terminal extension	Hypothetical protein; domain: transmembrane region
MLAAMGATLSPSEYIHLVR	5	LpaL13_20_-_707456-708208_ORF2970	LpaL13_20_-_707456-708208_ORF2970 [92-110]
EGHRVAPYWQWVADRGNK	3	LpaL13_07_+_286706-288637_ORF753	LpaL13_07_+_286706-288637_ORF753 [21-38]	Leishmania panamensis strain MHOM/PA/94/PSC-1_LPMP_070700	Leishmania donovani HU3_LDHU3_07.0870	N-terminal extension	Calcium-transporting ATPase
TDNALLDFVDR	2	LpaL13_07_+_286706-288637_ORF753	LpaL13_07_+_286706-288637_ORF753 [39-49]
VAMTEADACDMK	1	LpaL13_07_+_286706-288637_ORF753	LpaL13_07_+_286706-288637_ORF753 [50-61]
DITAFSVIRYPLTTDK	16	LpaL13_06_+_203819-204121_ORF549	LpaL13_06_+_203819-204121_ORF549 [14-29]	Leishmania panamensis MHOM/COL/81/L13_LPAL13_060011300	Leishmania braziliensis MHOM/BR/75/M2904 2019_LbrM.06.2.202120	N-terminal extension	60S ribosomal protein L23a
DITAFSVIR	3	LpaL13_06_+_203819-204121_ORF549	LpaL13_06_+_203819-204121_ORF549 [14-22]
YPLTTDK	2	LpaL13_06_+_203819-204121_ORF549	LpaL13_06_+_203819-204121_ORF549 [23-29]
MSSTVYDFGYELASK	2	LpaL13_01_+_83558-84193_ORF217	LpaL13_01_+_83558-84193_ORF217 [2-16]	Leishmania panamensis strain MHOM/PA/94/PSC-1_LPMP_010340	Leishmania braziliensis MHOM/BR/75/M2904 2019_LbrM.01.2.000370	N-terminal extension	Hypothetical protein; domain: transmembrane region
VYQTNDVGSVYR	3	LpaL13_01_+_83558-84193_ORF217	LpaL13_01_+_83558-84193_ORF217 [20-31]
LTQENMFIPVVK	2	LpaL13_01_+_83558-84193_ORF217	LpaL13_01_+_83558-84193_ORF217 [141-152]
RPVAGASNTLENQR	3	LpaL13_34_+_72028-75516_ORF252	LpaL13_34_+_72028-75516_ORF252 [81-94]	Leishmania panamensis MHOM/COL/81/L13_LPAL13_340007800	Leishmania braziliensis MHOM/BR/75/M2904_LbrM.34.0330	N-terminal extension	3-hydroxyacyl-CoA dehydrogenase, C-terminal domain
LFEALQPSLSTRIEAAVRQGK	3	LpaL13_34_+_72028-75516_ORF252	LpaL13_34_+_72028-75516_ORF252 [189-209]
VVPAAPAAPVAPK	1	LpaL13_34_+_72028-75516_ORF252	LpaL13_34_+_72028-75516_ORF252 [12-24]; [32-44]
STAPTSLASAAHVR	4	LpaL13_09_-_438601-442791_ORF207	LpaL13_09_-_438601-442791_ORF207 [65-78]	Leishmania panamensis MHOM/COL/81/L13_LPAL13_090017700	Leishmania braziliensis MHOM/BR/75/M2903_LBRM2903_090019300	N-terminal extension	AAA family ATPase
TLMDLLR	3	LpaL13_09_-_438601-442791_ORF207	LpaL13_09_-_438601-442791_ORF207 [93-99]
SSVGAPAEPR	2	LpaL13_09_-_438601-442791_ORF207	LpaL13_09_-_438601-442791_ORF207 [15-24]
VQELEAAATSNVER	4	LpaL13_33_+_898553-899674_ORF2315	LpaL13_33_+_898553-899674_ORF2315 [12-25]; [51-64]; [90-103]	Leishmania panamensis MHOM/COL/81/L13_LPAL13_330031600	Leishmania braziliensis MHOM/BR/75/M2904_LbrM.33.2560	N-terminal extension	Hypothetical protein; domain: transmembrane region
EREAAMCRLLMEVTQLK	2	LpaL13_33_+_898553-899674_ORF2315	LpaL13_33_+_898553-899674_ORF2315 [184-200]
LGAEHAAR	1	LpaL13_33_+_898553-899674_ORF2315	LpaL13_33_+_898553-899674_ORF2315 [29-36]; [68-75]; [107-114]
LASTKPHVNFAK	1	LpaL13_25_-_260173-260784_ORF1244	LpaL13_25_-_260173-260784_ORF1244 [71-82]	Leishmania panamensis MHOM/COL/81/L13_LPAL13_250013200	Leishmania arabica strain LEM1108_LARLEM1108_250012800	N-terminal extension	Hypothetical protein; domain:Thioredoxin_9
AMPTFYFFK	5	LpaL13_25_-_260173-260784_ORF1244	LpaL13_25_-_260173-260784_ORF1244 [99-107]		Leishmania infantum JPCM5_LINF_250012600
AIAPLIEK	6	LpaL13_25_-_260173-260784_ORF1244	LpaL13_25_-_260173-260784_ORF1244 [63-70]
SMQSLHQQLCHFSAGK	1	LpaL13_02_-_182059-186423_ORF134	LpaL13_02_-_182059-186423_ORF134 [227-242]	Leishmania panamensis strain MHOM/PA/94/PSC-1_LPMP_020450	Leishmania braziliensis MHOM/BR/75/M2904 2019_LbrM.02.2.000540	N-terminal extension	Protein tyrosine kinase
SAQFLSEMLGTSEK	1	LpaL13_02_-_182059-186423_ORF134	LpaL13_02_-_182059-186423_ORF134 [330-343]
GPSSIHRK	1	LpaL13_02_-_182059-186423_ORF134	LpaL13_02_-_182059-186423_ORF134 [60-67]
TPFQFNPETVCFADYDVGK	2	LpaL13_18_+_161861-165598_ORF506	LpaL13_18_+_161861-165598_ORF506 [237-255]	Leishmania panamensis strain MHOM/PA/94/PSC-1_LPMP_180570	Leishmania braziliensis MHOM/BR/75/M2904 2019_LbrM.18.2.000630	N-terminal extension	Flagellar-associated PapD
MLVTFTNTATVPK	1	LpaL13_18_+_161861-165598_ORF506	LpaL13_18_+_161861-165598_ORF506 [259-271]
NPFYWK	2	LpaL13_18_+_161861-165598_ORF506	LpaL13_18_+_161861-165598_ORF506 [192-197]
RFESYLNFVER	3	LpaL13_33_+_469960-471561_ORF1308	LpaL13_33_+_469960-471561_ORF1308 [63-73]	Leishmania panamensis strain MHOM/PA/94/PSC-1_LPMP_331390	Leishmania braziliensis MHOM/BR/75/M2904_LbrM.33.1540	N-terminal extension	Expression-site associated gene (ESAG3)
FQIVSNVVDWR	1	LpaL13_33_+_469960-471561_ORF1308	LpaL13_33_+_469960-471561_ORF1308 [24-34]	Leishmania panamensis MHOM/COL/81/L13_LPAL13_330019600
FESYLNFVER	1	LpaL13_33_+_469960-471561_ORF1308	LpaL13_33_+_469960-471561_ORF1308 [64-73]
VGEVEEMLSCCK	1	LpaL13_32_-_844828-846651_ORF1931	LpaL13_32_-_844828-846651_ORF1931 [96-107]	Leishmania panamensis MHOM/COL/81/L13_LPAL13_320029400	Leishmania braziliensis MHOM/BR/75/M2903_LBRM2903_320031300	N-terminal extension	Hypothetical protein
HTEVTNEK	2	LpaL13_32_-_844828-846651_ORF1931	LpaL13_32_-_844828-846651_ORF1931 [82-89]
ELNVLR	2	LpaL13_32_-_844828-846651_ORF1931	LpaL13_32_-_844828-846651_ORF1931 [42-47]
DSFTCCYQFGASRLGK	1	LpaL13_17_-_282524-285058_ORF942	LpaL13_17_-_282524-285058_ORF942 [287-302]	Leishmania panamensis MHOM/COL/81/L13_LPAL13_170012000	Leishmania braziliensis MHOM/BR/75/M2904 2019_LbrM.17.2.000670	N-terminal extension	Hypothetical protein; domain: glucosyltransferases, myotubularins and other putative membrane-associated proteins (GRAM)
VQVVTTSSAEDQLFHQLFPQVRRNEK	2	LpaL13_17_-_282524-285058_ORF942	LpaL13_17_-_282524-285058_ORF942 [23-48]
LVQSCNCGLIRRK	2	LpaL13_17_-_282524-285058_ORF942	LpaL13_17_-_282524-285058_ORF942 [49-61]
RLRAAASELSSINPQK	2	LpaL13_35_-_139220-140692_ORF6900	LpaL13_35_-_139220-140692_ORF6900 [36-51]	Leishmania panamensis strain MHOM/PA/94/PSC-1_LPMP_350520	Leishmania braziliensis MHOM/BR/75/M2904 2019_LbrM.35.2.000610	N-terminal extension	Hypothetical protein; domain: transmembrane region
SHSLSDTCTK	1	LpaL13_35_-_139220-140692_ORF6900	LpaL13_35_-_139220-140692_ORF6900 [100-109]
NVEGLNIMVSR	1	LpaL13_35_-_139220-140692_ORF6900	LpaL13_35_-_139220-140692_ORF6900 [63-73]
SSHLAEPLLIQALAR	1	LpaL13_33_+_865509-869201_ORF2293	LpaL13_33_+_865509-869201_ORF2293 [206-220]	Leishmania panamensis strain MHOM/PA/94/PSC-1_LPMP_332300	Leishmania braziliensis MHOM/BR/75/M2904 2019_LbrM.33.2.002470	N-terminal extension	Hypothetical protein
TNHGLAATTAAR	1	LpaL13_33_+_865509-869201_ORF2293	LpaL13_33_+_865509-869201_ORF2293 [221-232]
HCEGVHHDEGTQR	1	LpaL13_33_+_865509-869201_ORF2293	LpaL13_33_+_865509-869201_ORF2293 [241-253]
LLLADLIEK	1	LpaL13_20_+_1246252-1252884_ORF3635	LpaL13_20_+_1246252-1252884_ORF3635 [362-370]	Leishmania panamensis strain MHOM/PA/94/PSC-1_LPMP_203240	Leishmania braziliensis MHOM/BR/75/M2904 2019_LbrM.20.2.003110	N-terminal extension	Hypothetical protein
ILAAPQLNEK	1	LpaL13_20_+_1246252-1252884_ORF3635	LpaL13_20_+_1246252-1252884_ORF3635 [254-263]
VVPLCVNAYRRLK	1	LpaL13_20_+_1246252-1252884_ORF3635	LpaL13_20_+_1246252-1252884_ORF3635 [264-276]
TGGMRKPVEEK	3	LpaL13_02_-_17001-18182_ORF426	LpaL13_02_-_17001-18182_ORF426 [45-55]	Leishmania panamensis MHOM/COL/81/L13_LPAL13_020005600	Leishmania braziliensis MHOM/BR/75/M2904_LbrM.02.0190	N-terminal extension	Hypothetical protein
TGGMRKPVEEK	2	LpaL13_02_-_17001-18182_ORF426	LpaL13_02_-_17001-18182_ORF426 [45-55]
MFFDSSDARPHTLCK	1	LpaL13_20_+_36576-37829_ORF87	LpaL13_20_+_36576-37829_ORF87 [2-16]	Leishmania panamensis MHOM/COL/81/L13_LPAL13_200006200	Leishmania amazonensis strain PH8_LAMAPH8_000774500	N-terminal extension	Hypothetical protein
GGLTTGSTGIMPSEDHSGLADVNPR	2	LpaL13_20_+_36576-37829_ORF87	LpaL13_20_+_36576-37829_ORF87 [25-49]		Leishmania braziliensis MHOM/BR/75/M2903_LBRM2903_200005700
LQQQEAQQSGLTTGEGR	3	LpaL13_19_-_441018-454199_ORF511	LpaL13_19_-_441018-454199_ORF511 [185-201]	Leishmania panamensis strain MHOM/PA/94/PSC-1_LPMP_190990	Leishmania braziliensis MHOM/BR/75/M2903_LBRM2903_190018900	N-terminal extension	Ankyrin repeats
SWCNHQTR	1	LpaL13_19_-_441018-454199_ORF511	LpaL13_19_-_441018-454199_ORF511 [173-180]
MLVGMPVVDACVR	2	LpaL13_28_-_112158-113081_ORF2845	LpaL13_28_-_112158-113081_ORF2845 [1-13]	Leishmania panamensis strain MHOM/PA/94/PSC-1_LPMP_280380	Leishmania braziliensis MHOM/BR/75/M2904 2019_LbrM.28.2.000390	N-terminal extension	Saccharopine dehydrogenase
MLVGMPVVDACVRN	2	LpaL13_28_-_112158-113081_ORF2845	LpaL13_28_-_112158-113081_ORF2845 [1-13]
HLSDLAATLAPNVERVSAK	1	LpaL13_23_-_488644-490548_ORF885	LpaL13_23_-_488644-490548_ORF885 [58-76]	Leishmania panamensis MHOM/COL/81/L13_LPAL13_230020100	Leishmania braziliensis MHOM/BR/75/M2904 2019_LbrM.23.2.001230	N-terminal extension	Hypothetical protein
HLSDLAATLAPNVERVSAKA	1	LpaL13_23_-_488644-490548_ORF885	LpaL13_23_-_488644-490548_ORF885 [58-76]
REAALRSSTGPIESSYDISAIGHGNFDAVRK	1	LpaL13_23_-_488644-490548_ORF885	LpaL13_23_-_488644-490548_ORF885 [77-107]
PRAEAQVSRK	2	LpaL13_28_+_43981-45114_ORF147	LpaL13_28_+_43981-45114_ORF147 [122-131]	Leishmania panamensis MHOM/COL/81/L13_LPAL13_280006700	Leishmania braziliensis MHOM/BR/75/M2903_LBRM2903_280007100	N-terminal extension	RNA binding protein
PRAEAQVSRKR	1	LpaL13_28_+_43981-45114_ORF147	LpaL13_28_+_43981-45114_ORF147 [122-131]
RVEVPPTESMPEGLTRK	1	LpaL13_28_+_43981-45114_ORF147	LpaL13_28_+_43981-45114_ORF147 [165-181]
KAEDDFSATRRQRK	2	LpaL13_28_+_841341-841934_ORF2395	LpaL13_28_+_841341-841934_ORF2395 [14-27]	Leishmania panamensis MHOM/COL/81/L13_LPAL13_280029700	Leishmania braziliensis MHOM/BR/75/M2904_LbrM.28.2410	N-terminal extension	Glycoprotein 96-92
EEEEQRLRQREEEEK	1	LpaL13_28_+_841341-841934_ORF2395	LpaL13_28_+_841341-841934_ORF2395 [28-42]
KAEDDFSATRRQRK	1	LpaL13_28_+_841341-841934_ORF2395	LpaL13_28_+_841341-841934_ORF2395 [14-27]
QRTATAPLNQNK	3	LpaL13_35_-_748231-749346_ORF5315	LpaL13_35_-_748231-749346_ORF5315 [205-216]	Leishmania_panamensis_strain_MHOM/PA/94/PSC-1 (370/371 (99%))	Leishmania_braziliensis_MHOM/BR/75/M2903 (366/371 (99%))	N-terminal extension	TLD (Tolloid) protein
LAARLADALPSSCK	4	LpaL13_35_-_748231-749346_ORF5315	LpaL13_35_-_748231-749346_ORF5315 [108-121]
LADALPSSCK	1	LpaL13_35_-_748231-749346_ORF5315	LpaL13_35_-_748231-749346_ORF5315 [112-121]
NMLVINAK	6	LpaL13_35_-_748231-749346_ORF5315	LpaL13_35_-_748231-749346_ORF5315 [100-107]
DSPRVLGAFCESDWLTVTQREK	1	LpaL13_35_-_748231-749346_ORF5315	LpaL13_35_-_748231-749346_ORF5315 [165-186]
KREAESYHESPEPNTTK	3	LpaL13_19_+_475130-475945_ORF1269	LpaL13_19_+_475130-475945_ORF1269 [89-105]	Leishmania_panamensis_strain_MHOM/PA/94/PSC-1 (270/271 (99%))	Leishmania_braziliensis_MHOM/BR/75/M2903 ()	N-terminal extension	FCF1 (FCF1 RRNA-Processing Protein)
DYAAVLFRK	3	LpaL13_19_+_475130-475945_ORF1269	LpaL13_19_+_475130-475945_ORF1269 [110-118]
RQDNHAIK	2	LpaL13_19_+_475130-475945_ORF1269	LpaL13_19_+_475130-475945_ORF1269 [68-75]
RQDNHAIKK	1	LpaL13_19_+_475130-475945_ORF1269	LpaL13_19_+_475130-475945_ORF1269 [68-76]
ERLSDNIEK	1	LpaL13_10_+_7631-10900_ORF40	LpaL13_10_+_7631-10900_ORF40 [166-174]	Leishmania_panamensis_strain_MHOM/PA/94/PSC-1 (1087/1089 (99%))	Leishmania_braziliensis_MHOM/BR/75/M2903 (1081/1089 (99%))	N-terminal extension	Gryzun, putative trafficking through Golgi
DDPEQQLLLPR	1	LpaL13_10_+_7631-10900_ORF40	LpaL13_10_+_7631-10900_ORF40 [231-241]
MIVVCTDK	2	LpaL13_10_+_7631-10900_ORF40	LpaL13_10_+_7631-10900_ORF40 [73-80]
VATNTAIK	1	LpaL13_10_+_7631-10900_ORF40	LpaL13_10_+_7631-10900_ORF40 [81-88]
RGDETTEDESR	2	LpaL13_17_-_156720-158333_ORF1196	LpaL13_17_-_156720-158333_ORF1196 [61-71]	Leishmania panamensis strain MHOM/PA/94/PSC-1_LPMP_170380	Leishmania braziliensis MHOM/BR/75/M2903_LBRM2903_170010000	N-terminal extension	Hypothetical protein; domain: N6-adenineMlase domain
VEFNQYWYSR	1	LpaL13_17_-_156720-158333_ORF1196	LpaL13_17_-_156720-158333_ORF1196 [19-28]
TVFNAGHTK	3	LpaL13_17_-_156720-158333_ORF1196	LpaL13_17_-_156720-158333_ORF1196 [10-18]
NTIHHLVR	2	LpaL13_17_-_156720-158333_ORF1196	LpaL13_17_-_156720-158333_ORF1196 [29-36]
