# Supplementary material for: Applying a proteogenomic approach for improving genome annotation in Leishmania panamensis using high-resolution mass spectrometry data
Source: Research Square preprint supplement (doi:10.21203/rs.3.rs-8015195/v1), 2025-11-20
Supplement: Supplementary file 2 [file fb863341614914839b4c6614.xlsx]

## Sheet: Sheet1
Chowdhury et al. (2025). Identification of new protein-coding potential in Leishmania panamensis using a proteogenomics approach. Supplementary Table 1: Novel protein-coding genes in Leishmania panamensis
Note: Peptide-level evidence for these proteins is visualised in Supplementary Figure 1.
Peptide sequence	# PSMs	Master Protein Accessions	Positions in Master Proteins	L. panamensis orthologs	Other Leishmania species orthologs	Category	Description
GPQSSARQQLTLISSTK	6	LpaL13_19_+_289563-290984_ORF834	LpaL13_19_+_289563-290984_ORF834 [185-201]	Leishmania_panamensis_strain_MHOM/PA/94/PSC-1 (459/460 (99%))	Leishmania_braziliensis_MHOM/BR/75/M2903 (455/460 (99%))	Novel	Hypothetical protein
ILRPLQLAEGIK	6	LpaL13_19_+_289563-290984_ORF834	LpaL13_19_+_289563-290984_ORF834 [164-175]
SVDQTLTPALTNTWR	1	LpaL13_19_+_289563-290984_ORF834	LpaL13_19_+_289563-290984_ORF834 [123-137]
LCNALLAHPLFAAAGEPSK	2	LpaL13_19_+_289563-290984_ORF834	LpaL13_19_+_289563-290984_ORF834 [55-73]
AVPLQSATSALAGKPESWTLAPAMDNGDNSR	4	LpaL13_19_+_289563-290984_ORF834	LpaL13_19_+_289563-290984_ORF834 [205-235]
QLLLGIPAASLLTQLLPYDEAPVR	2	LpaL13_19_+_289563-290984_ORF834	LpaL13_19_+_289563-290984_ORF834 [138-161]
YEAENDGRK	1	LpaL13_19_+_289563-290984_ORF834	LpaL13_19_+_289563-290984_ORF834 [176-184]
TPTRGTELTFINNTDQQIVIGGVELK	3	LpaL13_23_+_208583-209008_ORF461	LpaL13_23_+_208583-209008_ORF461 [44-69]	Leishmania_panamensis_strain_MHOM/PA/94/PSC-1 (141/141 (100%))	Leishmania_braziliensis_MHOM/BR/75/M2904_2019 (140/141 (99%))	Novel	Phosphoacetylglucosamine mutase protein
QSCTIALHPSFPR	3	LpaL13_23_+_208583-209008_ORF461	LpaL13_23_+_208583-209008_ORF461 [102-114]
QEDMFSTDPNSVK	2	LpaL13_23_+_208583-209008_ORF461	LpaL13_23_+_208583-209008_ORF461 [70-82]
WPQYLLVPGGGSR	2	LpaL13_23_+_208583-209008_ORF461	LpaL13_23_+_208583-209008_ORF461 [89-101]
RPPSLEEIPYTEFYGIPLMAR	2	LpaL13_23_+_208583-209008_ORF461	LpaL13_23_+_208583-209008_ORF461 [12-32]
GCPIDIFLDGK	3	LpaL13_23_+_208583-209008_ORF461	LpaL13_23_+_208583-209008_ORF461 [33-43]
VITEAASTGSEK	3	LpaL13_04_-_8699-10705_ORF1042	LpaL13_04_-_8699-10705_ORF1042 [464-475]	Leishmania_panamensis_strain_MHOM/PA/94/PSC-1 (666/668 (99%))	Leishmania_braziliensis_MHOM/BR/75/M2904_2019 (660/666 (99%))	Novel	Phosphoacetylglucosamine mutase protein
QLRMQVYTAATGVK	3	LpaL13_04_-_8699-10705_ORF1042	LpaL13_04_-_8699-10705_ORF1042 [422-435]
DTRPSGEEIVNAGLR	5	LpaL13_04_-_8699-10705_ORF1042	LpaL13_04_-_8699-10705_ORF1042 [178-192]
VYAEATDPSVCESLSAEVVK	3	LpaL13_04_-_8699-10705_ORF1042	LpaL13_04_-_8699-10705_ORF1042 [584-603]
SYPPISTPYMHFAIAK	5	LpaL13_04_-_8699-10705_ORF1042	LpaL13_04_-_8699-10705_ORF1042 [204-219]
QVMMDCLAHDPNAFQLK	3	LpaL13_04_-_8699-10705_ORF1042	LpaL13_04_-_8699-10705_ORF1042 [150-166]
AFVRPSGTEPVVR	5	LpaL13_04_-_8699-10705_ORF1042	LpaL13_04_-_8699-10705_ORF1042 [571-583]
IINSEFPLR	2	LpaL13_04_-_8699-10705_ORF1042	LpaL13_04_-_8699-10705_ORF1042 [39-47]
AALLAAMR	2	LpaL13_04_-_8699-10705_ORF1042	LpaL13_04_-_8699-10705_ORF1042 [476-483]
AANAPSGSDLK	1	LpaL13_04_-_8699-10705_ORF1042	LpaL13_04_-_8699-10705_ORF1042 [139-149]
MQVYTAATGVK	1	LpaL13_04_-_8699-10705_ORF1042	LpaL13_04_-_8699-10705_ORF1042 [425-435]
SNAALLPPVAAR	3	LpaL13_04_-_8699-10705_ORF1042	LpaL13_04_-_8699-10705_ORF1042 [64-75]
VVAFLYDPK	1	LpaL13_04_-_8699-10705_ORF1042	LpaL13_04_-_8699-10705_ORF1042 [360-368]
EGHLQQLVVDCANGIGSLMMRELIAASK	1	LpaL13_04_-_8699-10705_ORF1042	LpaL13_04_-_8699-10705_ORF1042 [259-286]
ITTTLDER	1	LpaL13_04_-_8699-10705_ORF1042	LpaL13_04_-_8699-10705_ORF1042 [536-543]
VSMIAALR	3	LpaL13_04_-_8699-10705_ORF1042	LpaL13_04_-_8699-10705_ORF1042 [76-83]
WLGEEQMK	1	LpaL13_04_-_8699-10705_ORF1042	LpaL13_04_-_8699-10705_ORF1042 [392-399]
WVLLDGDR	2	LpaL13_04_-_8699-10705_ORF1042	LpaL13_04_-_8699-10705_ORF1042 [373-380]
CQVHFSR	1	LpaL13_04_-_8699-10705_ORF1042	LpaL13_04_-_8699-10705_ORF1042 [171-177]
NDDVGAKPPQANMR	2	LpaL13_29_+_986565-988895_ORF2767	LpaL13_29_+_986565-988895_ORF2767 [186-199]	Leishmania panamensis strain MHOM/PA/94/PSC-1_LPMP_130200	Leishmania braziliensis MHOM/BR/75/M2904 2019_LbrM.13.2.203990	Novel	Lipase (class 3) protein
RPALHQVLGTR	4	LpaL13_29_+_986565-988895_ORF2767	LpaL13_29_+_986565-988895_ORF2767 [394-404]
GDEDAQGAVVAGHFNVR	3	LpaL13_29_+_986565-988895_ORF2767	LpaL13_29_+_986565-988895_ORF2767 [681-697]
NFHHFVYGSDMVPR	4	LpaL13_29_+_986565-988895_ORF2767	LpaL13_29_+_986565-988895_ORF2767 [535-548]
MPTVVMTFHDQR	2	LpaL13_29_+_986565-988895_ORF2767	LpaL13_29_+_986565-988895_ORF2767 [244-255]
IQLSDHLLSSYNK	4	LpaL13_29_+_986565-988895_ORF2767	LpaL13_29_+_986565-988895_ORF2767 [752-764]
VTLTCNFCAVPK	3	LpaL13_29_+_986565-988895_ORF2767	LpaL13_29_+_986565-988895_ORF2767 [145-156]
GGLNTNVATWTMR	1	LpaL13_29_+_986565-988895_ORF2767	LpaL13_29_+_986565-988895_ORF2767 [435-447]
CINPSCPAPLSYAEVCVR	3	LpaL13_29_+_986565-988895_ORF2767	LpaL13_29_+_986565-988895_ORF2767 [224-241]
YSSYDAVGAVDLTMGNGAVR	1	LpaL13_29_+_986565-988895_ORF2767	LpaL13_29_+_986565-988895_ORF2767 [166-185]
TAATAMGDLFLQSR	1	LpaL13_29_+_986565-988895_ORF2767	LpaL13_29_+_986565-988895_ORF2767 [654-667]
AGLLAYMAEDNIMDR	1	LpaL13_29_+_986565-988895_ORF2767	LpaL13_29_+_986565-988895_ORF2767 [448-462]
LLRPTNVTELFTVFDGPGR	3	LpaL13_29_+_986565-988895_ORF2767	LpaL13_29_+_986565-988895_ORF2767 [363-381]
MVEAVEDAVR	1	LpaL13_29_+_986565-988895_ORF2767	LpaL13_29_+_986565-988895_ORF2767 [278-287]
WGVYALGCAIESPR	1	LpaL13_29_+_986565-988895_ORF2767	LpaL13_29_+_986565-988895_ORF2767 [209-222]
NSANTSSPTPR	2	LpaL13_29_+_986565-988895_ORF2767	LpaL13_29_+_986565-988895_ORF2767 [9-19]
ATCADCSTSVR	3	LpaL13_29_+_986565-988895_ORF2767	LpaL13_29_+_986565-988895_ORF2767 [126-136]
FISFSSGTTR	3	LpaL13_29_+_986565-988895_ORF2767	LpaL13_29_+_986565-988895_ORF2767 [384-393]
YFSSQQHR	3	LpaL13_29_+_986565-988895_ORF2767	LpaL13_29_+_986565-988895_ORF2767 [703-710]
ELWSNATMK	3	LpaL13_29_+_986565-988895_ORF2767	LpaL13_29_+_986565-988895_ORF2767 [409-417]
AAMEPCTFR	3	LpaL13_29_+_986565-988895_ORF2767	LpaL13_29_+_986565-988895_ORF2767 [200-208]
ALCFVTQMR	2	LpaL13_29_+_986565-988895_ORF2767	LpaL13_29_+_986565-988895_ORF2767 [157-165]
LFGSRNSANTSSPTPRTTAAAVDSNK	1	LpaL13_29_+_986565-988895_ORF2767	LpaL13_29_+_986565-988895_ORF2767 [4-29]
TIIAMLSDR	1	LpaL13_29_+_986565-988895_ORF2767	LpaL13_29_+_986565-988895_ORF2767 [739-747]
YMCTDDPK	3	LpaL13_29_+_986565-988895_ORF2767	LpaL13_29_+_986565-988895_ORF2767 [731-738]
EPFGNTSVR	1	LpaL13_29_+_986565-988895_ORF2767	LpaL13_29_+_986565-988895_ORF2767 [668-676]
VQSLALR	1	LpaL13_29_+_986565-988895_ORF2767	LpaL13_29_+_986565-988895_ORF2767 [463-469]
TNDFMGGR	2	LpaL13_29_+_986565-988895_ORF2767	LpaL13_29_+_986565-988895_ORF2767 [137-144]
HVNPSMYVSTSR	5	LpaL13_05_+_107789-108046_ORF250	LpaL13_05_+_107789-108046_ORF250 [70-81]	Leishmania arabica strain LEM1108_LARLEM1108_050009000	Leishmania braziliensis MHOM/BR/75/M2903_LBRM2903_050008900	Novel	Microtubule-associated protein
SAFTRPAVAAR	4	LpaL13_05_+_107789-108046_ORF250	LpaL13_05_+_107789-108046_ORF250 [24-34]
SAFPRPAVAVR	4	LpaL13_05_+_107789-108046_ORF250	LpaL13_05_+_107789-108046_ORF250 [59-69]
NAAPYSSTSELLK	6	LpaL13_19_-_137886-140762_ORF1380	LpaL13_19_-_137886-140762_ORF1380 [411-423]	Leishmania_panamensis_strain_MHOM/PA/94/PSC-1	Leishmania_braziliensis_MHOM/BR/75/M2904	Novel	Hydroxyneurosporene synthase (CrtC)
GLGWYDRELDGSVSELGRDAK	2	LpaL13_19_-_137886-140762_ORF1380	LpaL13_19_-_137886-140762_ORF1380 [262-282]
AVYTQQPFSITLDDSCAMRVAQK	3	LpaL13_19_-_137886-140762_ORF1380	LpaL13_19_-_137886-140762_ORF1380 [174-196]
YYADSVLDPESIEQLK	4	LpaL13_19_-_137886-140762_ORF1380	LpaL13_19_-_137886-140762_ORF1380 [120-135]
EAADIRDAVELIMK	3	LpaL13_19_-_137886-140762_ORF1380	LpaL13_19_-_137886-140762_ORF1380 [716-729]
VIETGDVSTLFDALDAIHTYK	4	LpaL13_19_-_137886-140762_ORF1380	LpaL13_19_-_137886-140762_ORF1380 [602-622]
RAEESCPTITTK	3	LpaL13_19_-_137886-140762_ORF1380	LpaL13_19_-_137886-140762_ORF1380 [92-103]
HYHDDVVMQTK	1	LpaL13_19_-_137886-140762_ORF1380	LpaL13_19_-_137886-140762_ORF1380 [326-336]
LQEMWDSLDPLLEDSFPK	2	LpaL13_19_-_137886-140762_ORF1380	LpaL13_19_-_137886-140762_ORF1380 [744-761]
HHDACMWALIDLK	4	LpaL13_19_-_137886-140762_ORF1380	LpaL13_19_-_137886-140762_ORF1380 [104-116]
VEAITECLLIAR	1	LpaL13_19_-_137886-140762_ORF1380	LpaL13_19_-_137886-140762_ORF1380 [730-741]
LEHVEAALLELLNK	1	LpaL13_19_-_137886-140762_ORF1380	LpaL13_19_-_137886-140762_ORF1380 [147-160]
TGGAVGTLCAMACVLCEAPAALSEAVEK	1	LpaL13_19_-_137886-140762_ORF1380	LpaL13_19_-_137886-140762_ORF1380 [623-650]
ITYPIAIAMGR	1	LpaL13_19_-_137886-140762_ORF1380	LpaL13_19_-_137886-140762_ORF1380 [687-697]
VCDTLFRPVRSMIDRGGK	7	LpaL13_19_-_137886-140762_ORF1380	LpaL13_19_-_137886-140762_ORF1380 [465-482]
TLCSFLVER	2	LpaL13_19_-_137886-140762_ORF1380	LpaL13_19_-_137886-140762_ORF1380 [766-774]
NTADDVYVR	2	LpaL13_19_-_137886-140762_ORF1380	LpaL13_19_-_137886-140762_ORF1380 [208-216]
ELDGSVSELGR	2	LpaL13_19_-_137886-140762_ORF1380	LpaL13_19_-_137886-140762_ORF1380 [269-279]
LQLDPAVTGRK	5	LpaL13_19_-_137886-140762_ORF1380	LpaL13_19_-_137886-140762_ORF1380 [136-146]
TQQQPVFHGK	8	LpaL13_19_-_137886-140762_ORF1380	LpaL13_19_-_137886-140762_ORF1380 [221-230]
VCDTLFRPVR	3	LpaL13_19_-_137886-140762_ORF1380	LpaL13_19_-_137886-140762_ORF1380 [465-474]
MIVVETRTDGSRHYHDDVVMQTK	1	LpaL13_19_-_137886-140762_ORF1380	LpaL13_19_-_137886-140762_ORF1380 [314-336]
VTGFVVVK	2	LpaL13_19_-_137886-140762_ORF1380	LpaL13_19_-_137886-140762_ORF1380 [247-254]
DAVELIMK	3	LpaL13_19_-_137886-140762_ORF1380	LpaL13_19_-_137886-140762_ORF1380 [722-729]
GRVPRPDRILK	4	LpaL13_19_-_137886-140762_ORF1380	LpaL13_19_-_137886-140762_ORF1380 [161-171]
LQLDPAVTGR	1	LpaL13_19_-_137886-140762_ORF1380	LpaL13_19_-_137886-140762_ORF1380 [136-145]
IQDLPPEK	1	LpaL13_19_-_137886-140762_ORF1380	LpaL13_19_-_137886-140762_ORF1380 [562-569]
QYAFEMR	2	LpaL13_19_-_137886-140762_ORF1380	LpaL13_19_-_137886-140762_ORF1380 [201-207]
GLGWYDR	2	LpaL13_19_-_137886-140762_ORF1380	LpaL13_19_-_137886-140762_ORF1380 [262-268]
IAYIGLRDVEEAEKK	8	LpaL13_34_-_499703-500743_ORF4252	LpaL13_34_-_499703-500743_ORF4252 [202-216]	Leishmania_panamensis_strain_MHOM/PA/94/PSC-1	Leishmania_braziliensis_MHOM/BR/75/M2904_2019	Novel	Arginase
IAYIGLRDVEEAEK	5	LpaL13_34_-_499703-500743_ORF4252	LpaL13_34_-_499703-500743_ORF4252 [202-215]
ILHDLNIAAFSMHHVDRYGIDK	4	LpaL13_34_-_499703-500743_ORF4252	LpaL13_34_-_499703-500743_ORF4252 [217-238]
LGWNTTLERVFDGK	8	LpaL13_34_-_499703-500743_ORF4252	LpaL13_34_-_499703-500743_ORF4252 [67-80]
NMSIVLAPFSGGQPLSGVELGPDYLLK	4	LpaL13_34_-_499703-500743_ORF4252	LpaL13_34_-_499703-500743_ORF4252 [31-57]
CMMGETLLYTPR	3	LpaL13_34_-_499703-500743_ORF4252	LpaL13_34_-_499703-500743_ORF4252 [330-341]
LVALDVVECNPLLAATEAHVK	6	LpaL13_34_-_499703-500743_ORF4252	LpaL13_34_-_499703-500743_ORF4252 [298-318]
ILHDLNIAAFSMHHVDR	2	LpaL13_34_-_499703-500743_ORF4252	LpaL13_34_-_499703-500743_ORF4252 [217-233]
VVRMAIDAVAPK	8	LpaL13_34_-_499703-500743_ORF4252	LpaL13_34_-_499703-500743_ORF4252 [239-250]
LGWNTTLER	4	LpaL13_34_-_499703-500743_ORF4252	LpaL13_34_-_499703-500743_ORF4252 [67-75]
DTISFGCAIAR	3	LpaL13_34_-_499703-500743_ORF4252	LpaL13_34_-_499703-500743_ORF4252 [319-329]
ILHDLNIAAFSMHHVDRYGIDK	1	LpaL13_34_-_499703-500743_ORF4252	LpaL13_34_-_499703-500743_ORF4252 [217-238]
CMMGETLLYTPR	1	LpaL13_34_-_499703-500743_ORF4252	LpaL13_34_-_499703-500743_ORF4252 [330-341]
QGLQQDMEK	3	LpaL13_34_-_499703-500743_ORF4252	LpaL13_34_-_499703-500743_ORF4252 [58-66]
VVRMAIDAVAPK	5	LpaL13_34_-_499703-500743_ORF4252	LpaL13_34_-_499703-500743_ORF4252 [239-250]
MAIDAVAPK	1	LpaL13_34_-_499703-500743_ORF4252	LpaL13_34_-_499703-500743_ORF4252 [242-250]
EGLFLCER	2	LpaL13_34_-_499703-500743_ORF4252	LpaL13_34_-_499703-500743_ORF4252 [284-291]
QGLQQDMEK	3	LpaL13_34_-_499703-500743_ORF4252	LpaL13_34_-_499703-500743_ORF4252 [58-66]
NDSIGHIK	2	LpaL13_34_-_499703-500743_ORF4252	LpaL13_34_-_499703-500743_ORF4252 [91-98]
LTSECTEK	4	LpaL13_34_-_499703-500743_ORF4252	LpaL13_34_-_499703-500743_ORF4252 [102-109]
IYNSVRK	3	LpaL13_34_-_499703-500743_ORF4252	LpaL13_34_-_499703-500743_ORF4252 [110-116]
IAECGR	2	LpaL13_34_-_499703-500743_ORF4252	LpaL13_34_-_499703-500743_ORF4252 [292-297]
IAYIGLR	1	LpaL13_34_-_499703-500743_ORF4252	LpaL13_34_-_499703-500743_ORF4252 [202-208]
GTEPVMVSYDVDTIDPLYVPATGTPVR	1	LpaL13_34_-_499703-500743_ORF4252	LpaL13_34_-_499703-500743_ORF4252 [251-277]
ERCVLLERICEEK	5	LpaL13_13_+_87615-89201_ORF306	LpaL13_13_+_87615-89201_ORF306 [296-308]	Leishmania_panamensis_strain_MHOM/PA/94/PSC-1 (525/528 (99%))	Leishmania_braziliensis_MHOM/BR/75/M2904_2019 (522/528 (99%))	Novel	Hypothetical protein; domain: Protein kinase C conserved region 2 (CalB).
AAAEFKPAIWDAQQRIAEGAK	3	LpaL13_13_+_87615-89201_ORF306	LpaL13_13_+_87615-89201_ORF306 [439-459]
ILDTVDPYSDVDISGK	5	LpaL13_13_+_87615-89201_ORF306	LpaL13_13_+_87615-89201_ORF306 [154-169]
VSGLVEFEILRGK	5	LpaL13_13_+_87615-89201_ORF306	LpaL13_13_+_87615-89201_ORF306 [2-14]
GTTGGMGGVAGEVDSARTLGDIITK	6	LpaL13_13_+_87615-89201_ORF306	LpaL13_13_+_87615-89201_ORF306 [228-252]
GTTGGMGGVAGEVDSAR	2	LpaL13_13_+_87615-89201_ORF306	LpaL13_13_+_87615-89201_ORF306 [228-244]
ELTGFEASQCMVTPSQR	3	LpaL13_13_+_87615-89201_ORF306	LpaL13_13_+_87615-89201_ORF306 [398-414]
VSGLVEFEILR	3	LpaL13_13_+_87615-89201_ORF306	LpaL13_13_+_87615-89201_ORF306 [2-12]
ITDLTFTPREEIEFRTNK	2	LpaL13_13_+_87615-89201_ORF306	LpaL13_13_+_87615-89201_ORF306 [277-294]
MVSGLVEFEILRGK	1	LpaL13_13_+_87615-89201_ORF306	LpaL13_13_+_87615-89201_ORF306 [1-14]
QIEIGAEPLVLEK	1	LpaL13_13_+_87615-89201_ORF306	LpaL13_13_+_87615-89201_ORF306 [124-136]
GNGIRIDHLDK	2	LpaL13_13_+_87615-89201_ORF306	LpaL13_13_+_87615-89201_ORF306 [476-486]
MPFVLFYGK	3	LpaL13_13_+_87615-89201_ORF306	LpaL13_13_+_87615-89201_ORF306 [89-97]
ITDLTFTPR	2	LpaL13_13_+_87615-89201_ORF306	LpaL13_13_+_87615-89201_ORF306 [277-285]
TLGDIITK	2	LpaL13_13_+_87615-89201_ORF306	LpaL13_13_+_87615-89201_ORF306 [245-252]
LQDWLNR	3	LpaL13_13_+_87615-89201_ORF306	LpaL13_13_+_87615-89201_ORF306 [317-323]
ICLTAEK	3	LpaL13_13_+_87615-89201_ORF306	LpaL13_13_+_87615-89201_ORF306 [266-272]
DLSLDGSNQLVPEGNQYVWLRLK	1	LpaL13_13_+_87615-89201_ORF306	LpaL13_13_+_87615-89201_ORF306 [170-192]
QLIELSK	2	LpaL13_13_+_87615-89201_ORF306	LpaL13_13_+_87615-89201_ORF306 [98-104]
ALSYEVR	2	LpaL13_13_+_87615-89201_ORF306	LpaL13_13_+_87615-89201_ORF306 [341-347]
THQVLTR	3	LpaL13_13_+_87615-89201_ORF306	LpaL13_13_+_87615-89201_ORF306 [259-265]
STIGHHRRNNDGSIVK	2	LpaL13_13_+_87615-89201_ORF306	LpaL13_13_+_87615-89201_ORF306 [460-475]
YVPTPAMAVVRPLTESEK	3	LpaL13_34_+_1390209-1392971_ORF3902	LpaL13_34_+_1390209-1392971_ORF3902 [656-673]	Leishmania_panamensis_strain_MHOM/PA/94/PSC-1 (917/920 (99%))		Novel	Hypothetical protein; domain: transmembrane helix region.
SSFVYSMAESGATVLK	1	LpaL13_34_+_1390209-1392971_ORF3902	LpaL13_34_+_1390209-1392971_ORF3902 [523-538]
LITDDVTEVMQRDLK	6	LpaL13_34_+_1390209-1392971_ORF3902	LpaL13_34_+_1390209-1392971_ORF3902 [609-623]
YPAEDEMCWMDYANIAPTK	3	LpaL13_34_+_1390209-1392971_ORF3902	LpaL13_34_+_1390209-1392971_ORF3902 [132-150]
LMGEPADSNLHTLPR	5	LpaL13_34_+_1390209-1392971_ORF3902	LpaL13_34_+_1390209-1392971_ORF3902 [216-230]
LITDDVTEVMQR	1	LpaL13_34_+_1390209-1392971_ORF3902	LpaL13_34_+_1390209-1392971_ORF3902 [609-620]
NANVVTWLWGAK	2	LpaL13_34_+_1390209-1392971_ORF3902	LpaL13_34_+_1390209-1392971_ORF3902 [294-305]
YYSSTIPQCDR	1	LpaL13_34_+_1390209-1392971_ORF3902	LpaL13_34_+_1390209-1392971_ORF3902 [737-747]
ECFLSLELEPYCK	1	LpaL13_34_+_1390209-1392971_ORF3902	LpaL13_34_+_1390209-1392971_ORF3902 [460-472]
VNYPLQPLTTETK	1	LpaL13_34_+_1390209-1392971_ORF3902	LpaL13_34_+_1390209-1392971_ORF3902 [93-105]
AQTDIENIRK	4	LpaL13_34_+_1390209-1392971_ORF3902	LpaL13_34_+_1390209-1392971_ORF3902 [439-448]
ELLQPISETDR	3	LpaL13_34_+_1390209-1392971_ORF3902	LpaL13_34_+_1390209-1392971_ORF3902 [375-385]
NSTDFLAWR	1	LpaL13_34_+_1390209-1392971_ORF3902	LpaL13_34_+_1390209-1392971_ORF3902 [284-292]
NEIPALLGLSR	3	LpaL13_34_+_1390209-1392971_ORF3902	LpaL13_34_+_1390209-1392971_ORF3902 [714-724]
DATLQTSLR	3	LpaL13_34_+_1390209-1392971_ORF3902	LpaL13_34_+_1390209-1392971_ORF3902 [705-713]
LLDAIIAR	2	LpaL13_34_+_1390209-1392971_ORF3902	LpaL13_34_+_1390209-1392971_ORF3902 [725-732]
AQTDIENIR	1	LpaL13_34_+_1390209-1392971_ORF3902	LpaL13_34_+_1390209-1392971_ORF3902 [439-447]
NSLTVLR	1	LpaL13_34_+_1390209-1392971_ORF3902	LpaL13_34_+_1390209-1392971_ORF3902 [453-459]
LLLFGMK	3	LpaL13_34_+_1390209-1392971_ORF3902	LpaL13_34_+_1390209-1392971_ORF3902 [273-279]
AYVSLEK	3	LpaL13_34_+_1390209-1392971_ORF3902	LpaL13_34_+_1390209-1392971_ORF3902 [602-608]
DRLSSAFYK	1	LpaL13_34_+_1390209-1392971_ORF3902	LpaL13_34_+_1390209-1392971_ORF3902 [306-314]
HLQSATEELEK	3	LpaL13_20.1_+_258794-261244_ORF541	LpaL13_20_+_258794-261244_ORF541 [205-215]	Leishmania_panamensis_strain_MHOM/PA/94/PSC-1 (814/816 (99%))	Leishmania_braziliensis_MHOM/BR/75/M2904_2019 810/816 (99%)	Novel	Hypothetical protein
YPLGTHTFSK	4	LpaL13_20_+_258794-261244_ORF541	LpaL13_20_+_258794-261244_ORF541 [69-78]
AVQNCGESHLMR	5	LpaL13_20_+_258794-261244_ORF541	LpaL13_20_+_258794-261244_ORF541 [699-710]
LMLTGTIIDDSICRQICK	1	LpaL13_20_+_258794-261244_ORF541	LpaL13_20_+_258794-261244_ORF541 [263-280]
LMLTGTIIDDSICR	2	LpaL13_20_+_258794-261244_ORF541	LpaL13_20_+_258794-261244_ORF541 [263-276]
RAEVVAELQTR	1	LpaL13_20_+_258794-261244_ORF541	LpaL13_20_+_258794-261244_ORF541 [653-663]
TFFRLAGKPIISAANEK	2	LpaL13_20_+_258794-261244_ORF541	LpaL13_20_+_258794-261244_ORF541 [724-740]
APRTEDVVVAAK	2	LpaL13_20_+_258794-261244_ORF541	LpaL13_20_+_258794-261244_ORF541 [559-570]
TLEVLNAWR	3	LpaL13_20_+_258794-261244_ORF541	LpaL13_20_+_258794-261244_ORF541 [290-298]
YATWGMAVQK	1	LpaL13_20_+_258794-261244_ORF541	LpaL13_20_+_258794-261244_ORF541 [234-243]
SVESNELSQR	2	LpaL13_20_+_258794-261244_ORF541	LpaL13_20_+_258794-261244_ORF541 [399-408]
SVDDELSPR	2	LpaL13_20_+_258794-261244_ORF541	LpaL13_20_+_258794-261244_ORF541 [449-457]
SLLSLLSR	3	LpaL13_20_+_258794-261244_ORF541	LpaL13_20_+_258794-261244_ORF541 [767-774]
ASVCIGSER	1	LpaL13_20_+_258794-261244_ORF541	LpaL13_20_+_258794-261244_ORF541 [281-289]
DATAFQRVLEELK	1	LpaL13_20_+_258794-261244_ORF541	LpaL13_20_+_258794-261244_ORF541 [544-556]
DVFGNAVCTPVICSQEGCQYK	3	LpaL13_34_-_585658-587049_ORF4095	LpaL13_34_-_585658-587049_ORF4095 [70-90]	Leishmania_panamensis_strain_MHOM/PA/94/PSC-1 (462/463 (99%))	Leishmania_braziliensis_MHOM/BR/75/M2903 ( 456/463 (98%))	Novel	Hypothetical protein; domain: transmembrane helix region.
VTDDTFAAPFYVLHRHNPIVVLSNNVK	7	LpaL13_34_-_585658-587049_ORF4095	LpaL13_34_-_585658-587049_ORF4095 [302-328]
SSFVGIDAYIESCR	1	LpaL13_34_-_585658-587049_ORF4095	LpaL13_34_-_585658-587049_ORF4095 [230-243]
VTDDTFAAPFYVLHR	4	LpaL13_34_-_585658-587049_ORF4095	LpaL13_34_-_585658-587049_ORF4095 [302-316]
STSFHPLPFDMWGR	4	LpaL13_34_-_585658-587049_ORF4095	LpaL13_34_-_585658-587049_ORF4095 [147-160]
LSCFQLWNAGIAACASTPR	1	LpaL13_34_-_585658-587049_ORF4095	LpaL13_34_-_585658-587049_ORF4095 [349-367]
FPLLNTVISAIR	2	LpaL13_34_-_585658-587049_ORF4095	LpaL13_34_-_585658-587049_ORF4095 [161-172]
LAFISSGTPSDLLQIASIVR	1	LpaL13_34_-_585658-587049_ORF4095	LpaL13_34_-_585658-587049_ORF4095 [28-47]
MGFLMGGAQK	1	LpaL13_34_-_585658-587049_ORF4095	LpaL13_34_-_585658-587049_ORF4095 [394-403]
SADQSRALLATLRK	3	LpaL13_34_-_585658-587049_ORF4095	LpaL13_34_-_585658-587049_ORF4095 [91-104]
ALIATLR	2	LpaL13_34_-_585658-587049_ORF4095	LpaL13_34_-_585658-587049_ORF4095 [97-103]
LHEALEDARSK	4	LpaL13_11_+_336216-340865_ORF813	LpaL13_11_+_336216-340865_ORF813 [360-370]	Leishmania_panamensis_strain_MHOM/PA/94/PSC-1 (1460/1460 (100%))	Leishmania_braziliensis_MHOM/BR/75/M2904_2019 (1437/1460 (98%))	Novel	Hypothetical protein
SNAVFSLGAVRK	3	LpaL13_11_+_336216-340865_ORF813	LpaL13_11_+_336216-340865_ORF813 [202-213]
CHQAAEAVAQGSTFPR	1	LpaL13_11_+_336216-340865_ORF813	LpaL13_11_+_336216-340865_ORF813 [71-86]
KAEGLSLYAK	1	LpaL13_11_+_336216-340865_ORF813	LpaL13_11_+_336216-340865_ORF813 [285-294]
SIDLNYLQQK	4	LpaL13_11_+_336216-340865_ORF813	LpaL13_11_+_336216-340865_ORF813 [42-51]
CAPSHLHMNYR	1	LpaL13_11_+_336216-340865_ORF813	LpaL13_11_+_336216-340865_ORF813 [60-70]
HTTPRRPGAASHQNK	1	LpaL13_11_+_336216-340865_ORF813	LpaL13_11_+_336216-340865_ORF813 [371-385]
DQVAARCYNSGRK	2	LpaL13_11_+_336216-340865_ORF813	LpaL13_11_+_336216-340865_ORF813 [326-338]
SNECIQNR	1	LpaL13_11_+_336216-340865_ORF813	LpaL13_11_+_336216-340865_ORF813 [52-59]
VQTSPAEQSLSK	3	LpaL13_04_-_11518-12900_ORF1085	LpaL13_04_-_11518-12900_ORF1085 [215-226]	Leishmania_panamensis_strain_MHOM/PA/94/PSC-1 (369/370 (99%))		Novel	Hypothetical protein; domain: RNA recognition motif.
HVNSDVVEDHFR	4	LpaL13_04_-_11518-12900_ORF1085	LpaL13_04_-_11518-12900_ORF1085 [85-96]
VVAVQHELGGSPVMLR	2	LpaL13_04_-_11518-12900_ORF1085	LpaL13_04_-_11518-12900_ORF1085 [130-145]
VVAVQHELGGSPVMLR	1	LpaL13_04_-_11518-12900_ORF1085	LpaL13_04_-_11518-12900_ORF1085 [130-145]
HNFFLSGIAR	4	LpaL13_04_-_11518-12900_ORF1085	LpaL13_04_-_11518-12900_ORF1085 [75-84]
LSILATPK	3	LpaL13_04_-_11518-12900_ORF1085	LpaL13_04_-_11518-12900_ORF1085 [294-301]
RYREETIK	1	LpaL13_04_-_11518-12900_ORF1085	LpaL13_04_-_11518-12900_ORF1085 [187-194]
EYGSGIR	1	LpaL13_04_-_11518-12900_ORF1085	LpaL13_04_-_11518-12900_ORF1085 [97-103]
LQQRIGSDLFNAVSK	4	LpaL13_34_+_294170-297301_ORF724	LpaL13_34_+_294170-297301_ORF724 [694-708]	Leishmania_panamensis_strain_MHOM/PA/94/PSC-1( 941/942 (99%))	Leishmania_braziliensis_MHOM/BR/75/M2904_2019 (916/924 (99%))	Novel	Hypothetical protein
MNEPVRVSVQGDESGFQK	1	LpaL13_34_+_294170-297301_ORF724	LpaL13_34_+_294170-297301_ORF724 [165-182]
FAHLMEAAFEASK	2	LpaL13_34_+_294170-297301_ORF724	LpaL13_34_+_294170-297301_ORF724 [318-330]
TSILVNEGK	1	LpaL13_34_+_294170-297301_ORF724	LpaL13_34_+_294170-297301_ORF724 [831-839]
LANVVAQNR	1	LpaL13_34_+_294170-297301_ORF724	LpaL13_34_+_294170-297301_ORF724 [226-234]
EQECFSALFR	1	LpaL13_34_+_294170-297301_ORF724	LpaL13_34_+_294170-297301_ORF724 [436-445]
LLVSFPER	1	LpaL13_34_+_294170-297301_ORF724	LpaL13_34_+_294170-297301_ORF724 [218-225]
YECTTPVGK	1	LpaL13_34_+_294170-297301_ORF724	LpaL13_34_+_294170-297301_ORF724 [183-191]
MHEHSEHFKK	18	LpaL13_34_+_754393-754554_ORF2009	LpaL13_34_+_754393-754554_ORF2009 [27-35]		Leishmania_braziliensis_MHOM/BR/75/M2904_2019	Novel	Kinetoplastid membrane protein-11 partial
KMHEHSEHFK	3	LpaL13_34_+_754393-754554_ORF2009	LpaL13_34_+_754393-754554_ORF2009 [26-35]
MHEHSEHFK	21	LpaL13_34_+_754393-754554_ORF2009	LpaL13_34_+_754393-754554_ORF2009 [27-35]
FAELLEQQK	6	LpaL13_34_+_754393-754554_ORF2009	LpaL13_34_+_754393-754554_ORF2009 [38-46]
AAQYPGK	4	LpaL13_34_+_754393-754554_ORF2009	LpaL13_34_+_754393-754554_ORF2009 [47-53]
FERMIK	2	LpaL13_34_+_754393-754554_ORF2009	LpaL13_34_+_754393-754554_ORF2009 [12-17]
KMHEHSEHFK	4	LpaL13_34_+_754393-754554_ORF2009	LpaL13_34_+_754393-754554_ORF2009 [26-35]
VAVDEDAASLMEK	1	LpaL13_23_-_490943-492469_ORF869	LpaL13_23_-_490943-492469_ORF869 [310-322]	Leishmania_panamensis_strain_MHOM/PA/94/PSC-1(508/508 (100%))	Leishmania_braziliensis_MHOM/BR/75/M2903 (503/508 (99%))	Novel	Hypothetical protein
VTVIDDYLRFVQK	3	LpaL13_23_-_490943-492469_ORF869	LpaL13_23_-_490943-492469_ORF869 [486-498]
EITNIFGANEK	1	LpaL13_23_-_490943-492469_ORF869	LpaL13_23_-_490943-492469_ORF869 [149-159]
LVSNATVVK	1	LpaL13_23_-_490943-492469_ORF869	LpaL13_23_-_490943-492469_ORF869 [462-470]
CLAGSFSVYPPTNDEVVQVLK	1	LpaL13_23_-_490943-492469_ORF869	LpaL13_23_-_490943-492469_ORF869 [89-109]
TDALRTLHRK	1	LpaL13_23_-_490943-492469_ORF869	LpaL13_23_-_490943-492469_ORF869 [359-368]
ARLERHGFYE	1	LpaL13_23_-_490943-492469_ORF869	LpaL13_23_-_490943-492469_ORF869 [499-508]
LADFDVSRGNIELVDVRHQAK	4	LpaL13_35_-_143085-143720_ORF6952	LpaL13_35_-_143085-143720_ORF6952 [94-114]	Leishmania_panamensis_strain_MHOM/PA/94/PSC-1 (206/211 (98%))	Leishmania_braziliensis_MHOM/BR/75/M2903 (197/209 (94%))	Novel	U2 small nuclear ribonucleoprotein
VTVETVEGDLYK	2	LpaL13_35_-_143085-143720_ORF6952	LpaL13_35_-_143085-143720_ORF6952 [80-91]
AAPSLQWRQDSVQQDLTK	1	LpaL13_35_-_143085-143720_ORF6952	LpaL13_35_-_143085-143720_ORF6952 [142-159]
IILLPQEMK	2	LpaL13_35_-_143085-143720_ORF6952	LpaL13_35_-_143085-143720_ORF6952 [133-141]
LADFDVSR	2	LpaL13_35_-_143085-143720_ORF6952	LpaL13_35_-_143085-143720_ORF6952 [94-101]
GNIELVDVR	1	LpaL13_35_-_143085-143720_ORF6952	LpaL13_35_-_143085-143720_ORF6952 [102-110]
SVMPPPRPVR	1	LpaL13_35_-_143085-143720_ORF6952	LpaL13_35_-_143085-143720_ORF6952 [169-178]
GDPYVRLVCLLK	4	LpaL13_20.2_+_543885-545186_ORF1322	LpaL13_20_+_543885-545186_ORF1322 [132-143]	Leishmania_panamensis_strain_MHOM/PA/94/PSC-1 (376/377 (99%))	Leishmania_braziliensis_MHOM/BR/75/M2904_2019 (375/377 (99%))	Novel	Hypothetical protein
ASAPSAAATLSPSSPVSLPNR	2	LpaL13_20.2_+_543885-545186_ORF1323	LpaL13_20_+_543885-545186_ORF1322 [238-258]
SLQLAIEDYFK	1	LpaL13_20.2_+_543885-545186_ORF1324	LpaL13_20_+_543885-545186_ORF1322 [91-101]
ILELEETVK	2	LpaL13_20.2_+_543885-545186_ORF1325	LpaL13_20_+_543885-545186_ORF1322 [396-404]
TVIAQQPSTK	1	LpaL13_20.2_+_543885-545186_ORF1326	LpaL13_20_+_543885-545186_ORF1322 [259-268]
GSLADAQQR	1	LpaL13_20.2_+_543885-545186_ORF1327	LpaL13_20_+_543885-545186_ORF1322 [387-395]
MLCEEMER	2	LpaL13_20.2_+_543885-545186_ORF1328	LpaL13_20_+_543885-545186_ORF1322 [175-182]
GARCCVICSNQK	6	LpaL13_28_+_939530-940420_ORF2540	LpaL13_28_+_939530-940420_ORF2540 [257-268]	Leishmania_panamensis_strain_MHOM/PA/94/PSC-1 (295/296 (99%))	Leishmania_braziliensis_MHOM/BR/75/M2903 (156/174 (90%))	Novel	Ribosomal protein S29
YELNVCRQCFRENAEHIGFTK	6	LpaL13_28_+_939530-940420_ORF2540	LpaL13_28_+_939530-940420_ORF2540 [274-294]
ENAEHIGFTK	5	LpaL13_28_+_939530-940420_ORF2540	LpaL13_28_+_939530-940420_ORF2540 [285-294]
CCVICSNQK	3	LpaL13_28_+_939530-940420_ORF2540	LpaL13_28_+_939530-940420_ORF2540 [260-268]
KYELNVCR	4	LpaL13_28_+_939530-940420_ORF2540	LpaL13_28_+_939530-940420_ORF2540 [273-280]
YELNVCR	3	LpaL13_28_+_939530-940420_ORF2540	LpaL13_28_+_939530-940420_ORF2540 [274-280]
GDTAILESCLRSNK	2	LpaL13_32_-_1150263-1150862_ORF1236	LpaL13_32_-_1150263-1150862_ORF1236 [181-194]	Leishmania_panamensis_strain_MHOM/PA/94/PSC-1 (199/199 (100%))	Leishmania_braziliensis_MHOM/BR/75/M2904_2019 (196/199 (98%))	Novel	Hypothetical protein; domain: signal peptide.
QIYNLVLSEAQNAILNSHEDADRK	1	LpaL13_32_-_1150263-1150862_ORF1236	LpaL13_32_-_1150263-1150862_ORF1236 [59-82]
QAYYCLAPTLSGGECPSYTFLR	1	LpaL13_32_-_1150263-1150862_ORF1236	LpaL13_32_-_1150263-1150862_ORF1236 [154-175]
GPWTEIVLQLRDGYVHGIK	1	LpaL13_32_-_1150263-1150862_ORF1236	LpaL13_32_-_1150263-1150862_ORF1236 [106-124]
GDTAILESCLR	3	LpaL13_32_-_1150263-1150862_ORF1236	LpaL13_32_-_1150263-1150862_ORF1236 [181-191]
YLPIALR	1	LpaL13_32_-_1150263-1150862_ORF1236	LpaL13_32_-_1150263-1150862_ORF1236 [125-131]
LQPYRYGQPTVVGCYTPVFK	2	LpaL13_31_-_136849-140304_ORF2782	LpaL13_31_-_136849-140304_ORF2782 [451-470]	Leishmania_panamensis_strain_MHOM/PA/94/PSC-1 (1139/1151 (99%))	Leishmania_braziliensis_MHOM/BR/75/M2903 (1080/1151 (94%))	Novel	Calpain-like cysteine peptidase
LFTVGLVSSTPVTTSGK	3	LpaL13_31_-_136849-140304_ORF2782	LpaL13_31_-_136849-140304_ORF2782 [1083-1099]
VTFQPSVHPYYVIPR	1	LpaL13_31_-_136849-140304_ORF2782	LpaL13_31_-_136849-140304_ORF2782 [1060-1074]
LMQLLSSSPVFHNR	1	LpaL13_31_-_136849-140304_ORF2782	LpaL13_31_-_136849-140304_ORF2782 [1104-1117]
LWYPLLEK	3	LpaL13_31_-_136849-140304_ORF2782	LpaL13_31_-_136849-140304_ORF2782 [758-765]
GIPADHPHR	2	LpaL13_31_-_136849-140304_ORF2782	LpaL13_31_-_136849-140304_ORF2782 [993-1001]
QSASSSSLAAIGAR	3	LpaL13_34_+_443147-444736_ORF1087	LpaL13_34_+_443147-444736_ORF1087 [99-112]	Leishmania_panamensis_strain_MHOM/PA/94/PSC-1	Leishmania_braziliensis_MHOM/BR/75/M2904_2019	Novel	Hypothetical protein
FGMHPEILTDTNAR	4	LpaL13_34_+_443147-444736_ORF1087	LpaL13_34_+_443147-444736_ORF1087 [50-63]
ESSAVPSANTPFLSTALAR	3	LpaL13_34_+_443147-444736_ORF1087	LpaL13_34_+_443147-444736_ORF1087 [80-98]
SESMCGGSATGSTPVTTAFK	1	LpaL13_34_+_443147-444736_ORF1087	LpaL13_34_+_443147-444736_ORF1087 [179-198]
GSPGMSAIETR	2	LpaL13_34_+_443147-444736_ORF1087	LpaL13_34_+_443147-444736_ORF1087 [302-312]
HNPSWIK	2	LpaL13_34_+_443147-444736_ORF1087	LpaL13_34_+_443147-444736_ORF1087 [43-49]
IGEMQEVLGIHFGGAK	5	LpaL13_11_+_501034-502935_ORF1176	LpaL13_11_+_501034-502935_ORF1176 [378-393]	Leishmania_panamensis_strain_MHOM/PA/94/PSC-1 (479/481 (99%))	Leishmania_braziliensis_MHOM/BR/75/M2904_2019 (474/481 (99%))	Novel	Hypothetical protein
AVAATAELEALCLK	2	LpaL13_11_+_501034-502935_ORF1176	LpaL13_11_+_501034-502935_ORF1176 [511-524]
TVVQRIVEDLNTDVWCLQDTSARHLK	1	LpaL13_11_+_501034-502935_ORF1176	LpaL13_11_+_501034-502935_ORF1176 [152-177]
ASNAHGVVGR	2	LpaL13_11_+_501034-502935_ORF1176	LpaL13_11_+_501034-502935_ORF1176 [254-263]
EVVNSVVVVK	2	LpaL13_11_+_501034-502935_ORF1176	LpaL13_11_+_501034-502935_ORF1176 [336-345]
LLPDGFR	1	LpaL13_11_+_501034-502935_ORF1176	LpaL13_11_+_501034-502935_ORF1176 [178-184]
HVRTTGFTNATLAASLK	1	LpaL13_14_-_391116-391928_ORF595	LpaL13_14_-_391116-391928_ORF595 [24-40]	Leishmania_panamensis_strain_MHOM/PA/94/PSC-1 (269/270 (99%))	Leishmania_braziliensis_MHOM/BR/75/M2903 (265/270 (98%))	Novel	Hypothetical protein
GMNGASSASSFLR	1	LpaL13_14_-_391116-391928_ORF595	LpaL13_14_-_391116-391928_ORF595 [194-206]
TATLGELLEPAR	1	LpaL13_14_-_391116-391928_ORF595	LpaL13_14_-_391116-391928_ORF595 [165-176]
GFPIALVEHIVK	2	LpaL13_14_-_391116-391928_ORF595	LpaL13_14_-_391116-391928_ORF595 [58-69]
NIAERAILSK	1	LpaL13_14_-_391116-391928_ORF595	LpaL13_14_-_391116-391928_ORF595 [111-120]
ILSEATK	1	LpaL13_14_-_391116-391928_ORF595	LpaL13_14_-_391116-391928_ORF595 [17-23]
AEQLAMEYEDAHHERPGTKK	3	LpaL13_15_-_528675-528845_ORF79	LpaL13_15_-_528675-528845_ORF79 [22-41]	Leishmania_panamensis_strain_MHOM/PA/94/PSC-1 (55/56 (98%))	Leishmania_braziliensis_MHOM/BR/75/M2904 (54/56 (96%))	Novel	Hypothetical protein
AEQLAMEYEDAHHERPGTK	12	LpaL13_15_-_528675-528845_ORF79	LpaL13_15_-_528675-528845_ORF79 [22-40]
HHDEDSDTVSPLDK	1	LpaL13_15_-_528675-528845_ORF79	LpaL13_15_-_528675-528845_ORF79 [8-21]
KQNETPSHQSKPK	1	LpaL13_15_-_528675-528845_ORF79	LpaL13_15_-_528675-528845_ORF79 [41-53]
VDADNNTEIVTK	3	LpaL13_01_-_72004-72441_ORF357	LpaL13_01_-_72004-72441_ORF357 [42-53]	Leishmania_panamensis_strain_MHOM/PA/94/PSC-1 (142/145 (98%))	Leishmania_braziliensis_MHOM/BR/75/M2903 ( 111/116 (96%))	Novel	Thioredoxin
CRVMQLPTFMLVK	4	LpaL13_01_-_72004-72441_ORF357	LpaL13_01_-_72004-72441_ORF357 [54-66]
AGQMLGYVIGADLAQLK	2	LpaL13_01_-_72004-72441_ORF357	LpaL13_01_-_72004-72441_ORF357 [67-83]
DLDRLTYEFSNVRFAK	3	LpaL13_01_-_72004-72441_ORF357	LpaL13_01_-_72004-72441_ORF357 [26-41]
ARIREEANK	1	LpaL13_01_-_72004-72441_ORF357	LpaL13_01_-_72004-72441_ORF357 [84-92]
ENGMTVASLSAMGTELAREHERK	6	LpaL13_24_+_6996-7496_ORF32	LpaL13_24_+_6996-7496_ORF32 [109-131]	Leishmania_panamensis_strain_MHOM/PA/94/PSC-1 (166/166 (100%))	Leishmania_braziliensis_MHOM/BR/75/M2904_2019 (163/166 (98%))	Novel	Hypothetical protein
NVPTEPQIVAR	3	LpaL13_24_+_6996-7496_ORF32	LpaL13_24_+_6996-7496_ORF32 [48-58]
LITFFPPNK	6	LpaL13_24_+_6996-7496_ORF32	LpaL13_24_+_6996-7496_ORF32 [59-67]
WAAALPDDLR	1	LpaL13_24_+_6996-7496_ORF32	LpaL13_24_+_6996-7496_ORF32 [75-84]
AFVPISR	2	LpaL13_24_+_6996-7496_ORF32	LpaL13_24_+_6996-7496_ORF32 [68-74]
MWNPHSYIAQAVGSK	3	LpaL13_23_+_3359-5194_ORF16	LpaL13_23_+_3359-5194_ORF16 [1-15]	Leishmania_panamensis_strain_MHOM/PA/94/PSC-1 (608/611 (99%))	Leishmania_braziliensis_MHOM/BR/75/M2903 (602/611 (99%))	Novel	Hypothetical protein
IINSVTLPSFYEYTTR	1	LpaL13_23_+_3359-5194_ORF16	LpaL13_23_+_3359-5194_ORF16 [18-33]
TSSGYFSVPR	1	LpaL13_23_+_3359-5194_ORF16	LpaL13_23_+_3359-5194_ORF16 [418-427]
YDAVAHR	1	LpaL13_23_+_3359-5194_ORF16	LpaL13_23_+_3359-5194_ORF16 [292-298]
YTPFVCK	1	LpaL13_23_+_3359-5194_ORF16	LpaL13_23_+_3359-5194_ORF16 [478-484]
IHGTNVTANNDAK	1	LpaL13_16_-_567232-570735_ORF208	LpaL13_16_-_567232-570735_ORF208 [257-269]	Leishmania_panamensis_strain_MHOM/PA/94/PSC-1 (1165/1167 (99%))	Leishmania_braziliensis_MHOM/BR/75/M2903 (1146/1167 (98%))	Novel	Hypothetical protein
VPPAAAGLPEPLLESVGR	2	LpaL13_16_-_567232-570735_ORF208	LpaL13_16_-_567232-570735_ORF208 [798-815]
LQDAAAAVERATK	1	LpaL13_16_-_567232-570735_ORF208	LpaL13_16_-_567232-570735_ORF208 [513-525]
FSTNEILQK	1	LpaL13_16_-_567232-570735_ORF208	LpaL13_16_-_567232-570735_ORF208 [161-169]
ERLSDNIEK	1	LpaL13_10_+_7631-10900_ORF40	LpaL13_10_+_7631-10900_ORF40 [166-174]	Leishmania_panamensis_strain_MHOM/PA/94/PSC-1 (1087/1089 (99%))	Leishmania_braziliensis_MHOM/BR/75/M2903 (1081/1089 (99%))	Novel	Hypothetical protein; domain: signal peptide.
DDPEQQLLLPR	1	LpaL13_10_+_7631-10900_ORF40	LpaL13_10_+_7631-10900_ORF40 [231-241]
MIVVCTDK	2	LpaL13_10_+_7631-10900_ORF40	LpaL13_10_+_7631-10900_ORF40 [73-80]
VATNTAIK	1	LpaL13_10_+_7631-10900_ORF40	LpaL13_10_+_7631-10900_ORF40 [81-88]
YILGHDIGAETVWSAQVAPLK	4	LpaL13_21_+_215231-215824_ORF518	LpaL13_21_+_215231-215824_ORF518 [145-165]	Leishmania_panamensis_strain_MHOM/PA/94/PSC-1 (179/182 (98%))	Leishmania_braziliensis_MHOM/BR/75/M2903 (154/159 (97%))	Novel	Domain of unknown function (DUF543)
WSYITDNTLK	2	LpaL13_21_+_215231-215824_ORF518	LpaL13_21_+_215231-215824_ORF518 [92-101]
AAVTAFGTGCGIGK	2	LpaL13_21_+_215231-215824_ORF518	LpaL13_21_+_215231-215824_ORF518 [125-138]
DALTESQK	1	LpaL13_21_+_215231-215824_ORF518	LpaL13_21_+_215231-215824_ORF518 [84-91]
VLLETALLQDVESPK	6	LpaL13_27_-_521789-523717_ORF1345	LpaL13_27_-_521789-523717_ORF1345 [571-585]		Leishmania braziliensis MHOM/BR/75/M2904 2019_LbrM.27.2.001380	Novel	Cation transporter
LRNNTDYTSAREK	2	LpaL13_27_-_521789-523717_ORF1345	LpaL13_27_-_521789-523717_ORF1345 [605-617]
LWMHSTAPRELTICTVAGK	3	LpaL13_27_-_521789-523717_ORF1345	LpaL13_27_-_521789-523717_ORF1345 [586-604]
VLLLSAPSYER	1	LpaL13_27_-_521789-523717_ORF1345	LpaL13_27_-_521789-523717_ORF1345 [552-562]
DVNEALQNEMGAIAAER	1	LpaL13_14_+_434366-435379_ORF1159	LpaL13_14_+_434366-435379_ORF1159 [181-197]		Leishmania braziliensis MHOM/BR/75/M2903_LBRM2903_140017100	Novel	Kinesin K39
DGLALIVAQAAEDK	1	LpaL13_14_+_434366-435379_ORF1159	LpaL13_14_+_434366-435379_ORF1159 [198-211]
ADFAERFSK	2	LpaL13_14_+_434366-435379_ORF1159	LpaL13_14_+_434366-435379_ORF1159 [212-220]
QSVEECFK	1	LpaL13_14_+_434366-435379_ORF1159	LpaL13_14_+_434366-435379_ORF1159 [316-323]
TIEDTIRQCPSSFNVK	2	LpaL13_35_-_2142905-2143885_ORF1018	LpaL13_35_-_2142905-2143885_ORF1018 [155-170]		Leishmania braziliensis MHOM/BR/75/M2903_LBRM2903_350072500	Novel	Nitroreductase
RRSIYSLDSTLPQSDK	1	LpaL13_35_-_2142905-2143885_ORF1018	LpaL13_35_-_2142905-2143885_ORF1018 [135-150]
IQQQTYPR	2	LpaL13_35_-_2142905-2143885_ORF1018	LpaL13_35_-_2142905-2143885_ORF1018 [231-238]
VWTIVK	1	LpaL13_35_-_2142905-2143885_ORF1018	LpaL13_35_-_2142905-2143885_ORF1018 [185-190]
LEGATPGGSVDVLIVHQSPDIPR	3	LpaL13_35_-_1029310-1030839_ORF4398	LpaL13_35_-_1029310-1030839_ORF4398 [351-373]	Leishmania panamensis strain MHOM/PA/94/PSC-1_LPMP_352730	Leishmania braziliensis MHOM/BR/75/M2903_LBRM2903_350036700	Novel	Calcineurin-like phosphoesterase superfamily domain
ENDDPPGLSTAPR	2	LpaL13_35_-_1029310-1030839_ORF4398	LpaL13_35_-_1029310-1030839_ORF4398 [328-340]
LVIISDTHER	1	LpaL13_35_-_1029310-1030839_ORF4398	LpaL13_35_-_1029310-1030839_ORF4398 [192-201]
CSSEQHLCAR	1	LpaL13_35_-_1029310-1030839_ORF4398	LpaL13_35_-_1029310-1030839_ORF4398 [341-350]
EMMEAHNIFADK	6	LpaL13_29_-_94-978_ORF2781	LpaL13_29_-_94-978_ORF2781 [114-125]; LpaL13_20_-_654353-655705_ORF26 [44-55]	Leishmania panamensis strain MHOM/PA/94/PSC-1_LPMP_070010	Leishmania braziliensis MHOM/BR/75/M2904_LbrM.12.0010	Novel	TATE-associated hypothetical protein
EMMEAHNIFAD	3	LpaL13_29_-_94-978_ORF2781	LpaL13_29_-_94-978_ORF2781 [114-125]; LpaL13_20_-_654353-655705_ORF26 [44-55]
DPLEGYK	3	LpaL13_29_-_94-978_ORF2781	LpaL13_29_-_94-978_ORF2781 [149-155]; LpaL13_20_-_654353-655705_ORF26 [79-85]
LVCNDTEVAEGQQK	2	LpaL13_32_+_190447-191070_ORF598	LpaL13_32_+_190447-191070_ORF598 [175-188]	Leishmania panamensis strain MHOM/PA/94/PSC-1_LPMP_320590	Leishmania braziliensis MHOM/BR/75/M2904 2019_LbrM.32.2.000620	Novel	Replication termination factor
QSVINYLLDRK	3	LpaL13_32_+_190447-191070_ORF598	LpaL13_32_+_190447-191070_ORF598 [73-83]
EETFSIKK	1	LpaL13_32_+_190447-191070_ORF598	LpaL13_32_+_190447-191070_ORF598 [94-101]
IMAFEAEQR	1	LpaL13_24_-_821238-822446_ORF41	LpaL13_24_-_821238-822446_ORF41 [195-203]	Leishmania panamensis strain MHOM/PA/94/PSC-1_LPMP_242300	Leishmania braziliensis MHOM/BR/75/M2903_LBRM2903_240031700	Novel	Hypothetical protein
ELQYQQK	1	LpaL13_24_-_821238-822446_ORF41	LpaL13_24_-_821238-822446_ORF41 [284-290]
IEEEAAAER	2	LpaL13_24_-_821238-822446_ORF41	LpaL13_24_-_821238-822446_ORF41 [273-281]
ETLAPGLGAAGQAAGSAVASRSLVK	3	LpaL13_19_+_252835-254238_ORF710	LpaL13_19_+_252835-254238_ORF710 [223-247]	Leishmania panamensis strain MHOM/PA/94/PSC-1_LPMP_190430	Leishmania braziliensis MHOM/BR/75/M2904 2019_LbrM.19.2.000770	Novel	Hypothetical protein
GAVESSSVPFEAVR	1	LpaL13_19_+_252835-254238_ORF710	LpaL13_19_+_252835-254238_ORF710 [56-69]
VDIQHFSNFFPPVK	1	LpaL13_21_+_213255-215141_ORF546	LpaL13_21_+_213255-215141_ORF546 [53-66]	Leishmania panamensis strain MHOM/PA/94/PSC-1_LPMP_210760	Leishmania braziliensis MHOM/BR/75/M2904 2019_LbrM.21.2.000790	Novel	Aminoacyltransferase ATEL1
GLPVSDFFK	2	LpaL13_21_+_213255-215141_ORF546	LpaL13_21_+_213255-215141_ORF546 [344-352]
HHGSEMVPLR	1	LpaL13_22_-_288580-292218_ORF760	LpaL13_22_-_288580-292218_ORF760 [480-489]	Leishmania panamensis strain MHOM/PA/94/PSC-1_LPMP_220660	Leishmania braziliensis MHOM/BR/75/M2904 2019_LbrM.22.2.000690	Novel	Hypothetical protein; domain: zinc finger.
LHVPLSAIQTTK	1	LpaL13_22_-_288580-292218_ORF760	LpaL13_22_-_288580-292218_ORF760 [758-769]
ALDYEQQVAER	1	LpaL13_20_+_1318212-1319888_ORF3763	LpaL13_20_+_1318212-1319888_ORF3763 [360-370]	Leishmania panamensis strain MHOM/PA/94/PSC-1_LPMP_203450	Leishmania braziliensis MHOM/BR/75/M2904 2019_LbrM.20.2.003320	Novel	Hypothetical protein
FICHEALFR	1	LpaL13_20_+_1318212-1319888_ORF3763	LpaL13_20_+_1318212-1319888_ORF3763 [306-314]
ERCVLLERICEEK	5	LpaL13_13_+_87615-89201_ORF306	LpaL13_13_+_87615-89201_ORF306 [296-308]	Leishmania_panamensis_strain_MHOM/PA/94/PSC-1 (525/528 (99%))	Leishmania_braziliensis_MHOM/BR/75/M2904_2019 (522/528 (99%))	Novel	Hypothetical protein; domain: Protein kinase C conserved region 2 (CalB).
AAAEFKPAIWDAQQRIAEGAK	3	LpaL13_13_+_87615-89201_ORF306	LpaL13_13_+_87615-89201_ORF306 [439-459]
ILDTVDPYSDVDISGK	5	LpaL13_13_+_87615-89201_ORF306	LpaL13_13_+_87615-89201_ORF306 [154-169]
VSGLVEFEILRGK	5	LpaL13_13_+_87615-89201_ORF306	LpaL13_13_+_87615-89201_ORF306 [2-14]
GTTGGMGGVAGEVDSARTLGDIITK	6	LpaL13_13_+_87615-89201_ORF306	LpaL13_13_+_87615-89201_ORF306 [228-252]
GTTGGMGGVAGEVDSAR	2	LpaL13_13_+_87615-89201_ORF306	LpaL13_13_+_87615-89201_ORF306 [228-244]
ELTGFEASQCMVTPSQR	3	LpaL13_13_+_87615-89201_ORF306	LpaL13_13_+_87615-89201_ORF306 [398-414]
VSGLVEFEILR	3	LpaL13_13_+_87615-89201_ORF306	LpaL13_13_+_87615-89201_ORF306 [2-12]
ITDLTFTPREEIEFRTNK	2	LpaL13_13_+_87615-89201_ORF306	LpaL13_13_+_87615-89201_ORF306 [277-294]
MVSGLVEFEILRGK	1	LpaL13_13_+_87615-89201_ORF306	LpaL13_13_+_87615-89201_ORF306 [1-14]
QIEIGAEPLVLEK	1	LpaL13_13_+_87615-89201_ORF306	LpaL13_13_+_87615-89201_ORF306 [124-136]
GNGIRIDHLDK	2	LpaL13_13_+_87615-89201_ORF306	LpaL13_13_+_87615-89201_ORF306 [476-486]
MPFVLFYGK	3	LpaL13_13_+_87615-89201_ORF306	LpaL13_13_+_87615-89201_ORF306 [89-97]
ITDLTFTPR	2	LpaL13_13_+_87615-89201_ORF306	LpaL13_13_+_87615-89201_ORF306 [277-285]
TLGDIITK	2	LpaL13_13_+_87615-89201_ORF306	LpaL13_13_+_87615-89201_ORF306 [245-252]
LQDWLNR	3	LpaL13_13_+_87615-89201_ORF306	LpaL13_13_+_87615-89201_ORF306 [317-323]
ICLTAEK	3	LpaL13_13_+_87615-89201_ORF306	LpaL13_13_+_87615-89201_ORF306 [266-272]
DLSLDGSNQLVPEGNQYVWLRLK	1	LpaL13_13_+_87615-89201_ORF306	LpaL13_13_+_87615-89201_ORF306 [170-192]
QLIELSK	2	LpaL13_13_+_87615-89201_ORF306	LpaL13_13_+_87615-89201_ORF306 [98-104]
ALSYEVR	2	LpaL13_13_+_87615-89201_ORF306	LpaL13_13_+_87615-89201_ORF306 [341-347]
THQVLTR	3	LpaL13_13_+_87615-89201_ORF306	LpaL13_13_+_87615-89201_ORF306 [259-265]
STIGHHRRNNDGSIVK	2	LpaL13_13_+_87615-89201_ORF306	LpaL13_13_+_87615-89201_ORF306 [460-475]
AEQLAMEYEDAHHERPGTKK	3	LpaL13_15_-_528675-528845_ORF79	LpaL13_15_-_528675-528845_ORF79 [22-41]	Leishmania_panamensis_strain_MHOM/PA/94/PSC-1 (55/56 (98%))	Leishmania_braziliensis_MHOM/BR/75/M2904 (54/56 (96%))	Novel	Hypothetical protein
AEQLAMEYEDAHHERPGTK	12	LpaL13_15_-_528675-528845_ORF79	LpaL13_15_-_528675-528845_ORF79 [22-40]
AEQLAMEYEDAHHERPGTK	2	LpaL13_15_-_528675-528845_ORF79	LpaL13_15_-_528675-528845_ORF79 [22-40]
HHDEDSDTVSPLDK	1	LpaL13_15_-_528675-528845_ORF79	LpaL13_15_-_528675-528845_ORF79 [8-21]
KQNETPSHQSKPK	1	LpaL13_15_-_528675-528845_ORF79	LpaL13_15_-_528675-528845_ORF79 [41-53]
LASTKPHVNFAK	1	LpaL13_25_-_260173-260784_ORF1244	LpaL13_25_-_260173-260784_ORF1244 [71-82]		Leishmania arabica_LARLEM1108_250012800	Novel	Thioredoxin
AMPTFYFFK	5	LpaL13_25_-_260173-260784_ORF1244	LpaL13_25_-_260173-260784_ORF1244 [99-107]
AIAPLIEK	6	LpaL13_25_-_260173-260784_ORF1244	LpaL13_25_-_260173-260784_ORF1244 [63-70]
GDTAILESCLRSNK	2	LpaL13_32_-_1150263-1150862_ORF1236	LpaL13_32_-_1150263-1150862_ORF1236 [181-194]	Leishmania_panamensis_strain_MHOM/PA/94/PSC-1 (199/199 (100%))	Leishmania_braziliensis_MHOM/BR/75/M2904_2019 (196/199 (98%))	Novel	Hypothetical protein; domain: signal peptide.
QIYNLVLSEAQNAILNSHEDADRK	1	LpaL13_32_-_1150263-1150862_ORF1236	LpaL13_32_-_1150263-1150862_ORF1236 [59-82]
QAYYCLAPTLSGGECPSYTFLR	1	LpaL13_32_-_1150263-1150862_ORF1236	LpaL13_32_-_1150263-1150862_ORF1236 [154-175]
GPWTEIVLQLRDGYVHGIK	1	LpaL13_32_-_1150263-1150862_ORF1236	LpaL13_32_-_1150263-1150862_ORF1236 [106-124]
GDTAILESCLR	3	LpaL13_32_-_1150263-1150862_ORF1236	LpaL13_32_-_1150263-1150862_ORF1236 [181-191]
YLPIALR	1	LpaL13_32_-_1150263-1150862_ORF1236	LpaL13_32_-_1150263-1150862_ORF1236 [125-131]
LPEHAQWVNK	12	LpaL13_11_+_169242-172196_ORF439	LpaL13_11_+_169242-172196_ORF439 [289-298]	Leishmania_panamensis_strain_MHOM/PA/94/PSC-1	Leishmania_braziliensis_MHOM/BR/75/M2904_2019	Novel	Argonaute/dicer protein
DLQHPSQPCEFK	9	LpaL13_11_+_169242-172196_ORF439	LpaL13_11_+_169242-172196_ORF439 [571-582]
MSRRMPYPADSLLLNK	7	LpaL13_11_+_169242-172196_ORF439	LpaL13_11_+_169242-172196_ORF439 [462-477]
LSVEDGFSIECTRK	5	LpaL13_11_+_169242-172196_ORF439	LpaL13_11_+_169242-172196_ORF439 [249-262]
RTRTSAEVEDLCVCTGQAILAPAK	2	LpaL13_11_+_169242-172196_ORF439	LpaL13_11_+_169242-172196_ORF439 [225-248]
TSFDSAAQRITEGSGTFAMVK	2	LpaL13_11_+_169242-172196_ORF439	LpaL13_11_+_169242-172196_ORF439 [612-632]
IGQLCFVADVDEAGK	6	LpaL13_11_+_169242-172196_ORF439	LpaL13_11_+_169242-172196_ORF439 [678-692]
STVERGGDLVTMDAISLNALRIVK	6	LpaL13_11_+_169242-172196_ORF439	LpaL13_11_+_169242-172196_ORF439 [321-344]
IIAFGLADTYSEHIGSDYVDMK	4	LpaL13_11_+_169242-172196_ORF439	LpaL13_11_+_169242-172196_ORF439 [299-320]
QSGSTTAMMDVLQLDVSTK	1	LpaL13_11_+_169242-172196_ORF439	LpaL13_11_+_169242-172196_ORF439 [345-363]
AIDFNILASSPTMFK	4	LpaL13_11_+_169242-172196_ORF439	LpaL13_11_+_169242-172196_ORF439 [412-426]
VSGRVLPAPTIYVPSGPNMFNRINTAEYTGQAGFALGLK	2	LpaL13_11_+_169242-172196_ORF439	LpaL13_11_+_169242-172196_ORF439 [532-570]
TLLMDEYFMHGNITHWLQK	6	LpaL13_11_+_169242-172196_ORF439	LpaL13_11_+_169242-172196_ORF439 [583-601]
LTYNMCYMYPNKPDALPLPLPIK	1	LpaL13_11_+_169242-172196_ORF439	LpaL13_11_+_169242-172196_ORF439 [933-955]
RQNANEVLNNR	4	LpaL13_11_+_169242-172196_ORF439	LpaL13_11_+_169242-172196_ORF439 [775-785]
NVPQMITQQVAAK	4	LpaL13_11_+_169242-172196_ORF439	LpaL13_11_+_169242-172196_ORF439 [665-677]
ETASAYAGFSNVPR	4	LpaL13_11_+_169242-172196_ORF439	LpaL13_11_+_169242-172196_ORF439 [863-876]
TSAEVEDLCVCTGQAILAPAK	3	LpaL13_11_+_169242-172196_ORF439	LpaL13_11_+_169242-172196_ORF439 [228-248]
MPYPADSLLLNK	2	LpaL13_11_+_169242-172196_ORF439	LpaL13_11_+_169242-172196_ORF439 [466-477]
MAWDPTAVFPR	4	LpaL13_11_+_169242-172196_ORF439	LpaL13_11_+_169242-172196_ORF439 [852-862]
LPILCSIYPNER	4	LpaL13_11_+_169242-172196_ORF439	LpaL13_11_+_169242-172196_ORF439 [486-497]
VPVPVETNCFPIDLSEGR	7	LpaL13_11_+_169242-172196_ORF439	LpaL13_11_+_169242-172196_ORF439 [165-182]
GGDLVTMDAISLNALR	6	LpaL13_11_+_169242-172196_ORF439	LpaL13_11_+_169242-172196_ORF439 [326-341]
VLPAPTIYVPSGPNMFNR	1	LpaL13_11_+_169242-172196_ORF439	LpaL13_11_+_169242-172196_ORF439 [536-553]
VLASPLMITVLQQYGVR	4	LpaL13_11_+_169242-172196_ORF439	LpaL13_11_+_169242-172196_ORF439 [508-524]
SFACRPLLIVGAVVGTAMNTMLEK	2	LpaL13_11_+_169242-172196_ORF439	LpaL13_11_+_169242-172196_ORF439 [693-716]
ERESWAVSAAQANAR	1	LpaL13_11_+_169242-172196_ORF439	LpaL13_11_+_169242-172196_ORF439 [146-160]
LSVEDGFSIECTR	1	LpaL13_11_+_169242-172196_ORF439	LpaL13_11_+_169242-172196_ORF439 [249-261]
LPILCSIYPNERIK	2	LpaL13_11_+_169242-172196_ORF439	LpaL13_11_+_169242-172196_ORF439 [486-499]
YNVALPSPRK	3	LpaL13_11_+_169242-172196_ORF439	LpaL13_11_+_169242-172196_ORF439 [602-611]
QNANEVLNNR	2	LpaL13_11_+_169242-172196_ORF439	LpaL13_11_+_169242-172196_ORF439 [776-785]
AASISLMDLQK	2	LpaL13_11_+_169242-172196_ORF439	LpaL13_11_+_169242-172196_ORF439 [922-932]
TNPEETFVEYFK	6	LpaL13_11_+_169242-172196_ORF439	LpaL13_11_+_169242-172196_ORF439 [427-438]
ESWAVSAAQANAR	2	LpaL13_11_+_169242-172196_ORF439	LpaL13_11_+_169242-172196_ORF439 [148-160]
GSIVSQMAVVDLTR	1	LpaL13_11_+_169242-172196_ORF439	LpaL13_11_+_169242-172196_ORF439 [651-664]
RAASISLMDLQK	3	LpaL13_11_+_169242-172196_ORF439	LpaL13_11_+_169242-172196_ORF439 [921-932]
IRYDGEVSLK	4	LpaL13_11_+_169242-172196_ORF439	LpaL13_11_+_169242-172196_ORF439 [279-288]
LNEAQLSK	6	LpaL13_11_+_169242-172196_ORF439	LpaL13_11_+_169242-172196_ORF439 [478-485]
EAGAYNNFK	3	LpaL13_11_+_169242-172196_ORF439	LpaL13_11_+_169242-172196_ORF439 [637-645]
ISLQNELLRTIRK	7	LpaL13_11_+_169242-172196_ORF439	LpaL13_11_+_169242-172196_ORF439 [206-218]
ISLQNELLR	3	LpaL13_11_+_169242-172196_ORF439	LpaL13_11_+_169242-172196_ORF439 [206-214]
VSRDNTEER	1	LpaL13_11_+_169242-172196_ORF439	LpaL13_11_+_169242-172196_ORF439 [265-273]
YNVALPSPR	1	LpaL13_11_+_169242-172196_ORF439	LpaL13_11_+_169242-172196_ORF439 [602-610]
YDGEVSLK	3	LpaL13_11_+_169242-172196_ORF439	LpaL13_11_+_169242-172196_ORF439 [281-288]
CSDEIRR	2	LpaL13_11_+_169242-172196_ORF439	LpaL13_11_+_169242-172196_ORF439 [370-376]
CAYEYARK	4	LpaL13_11_+_169242-172196_ORF439	LpaL13_11_+_169242-172196_ORF439 [956-963]
ELPTRMRPTMHYL	6	LpaL13_11_+_169242-172196_ORF439	LpaL13_11_+_169242-172196_ORF439 [972-984]
EVTAHFK	2	LpaL13_11_+_169242-172196_ORF439	LpaL13_11_+_169242-172196_ORF439 [792-798]
GFSTTDCR	3	LpaL13_11_+_169242-172196_ORF439	LpaL13_11_+_169242-172196_ORF439 [877-884]
CAYEYAR	1	LpaL13_11_+_169242-172196_ORF439	LpaL13_11_+_169242-172196_ORF439 [956-962]
CSDEIR	2	LpaL13_11_+_169242-172196_ORF439	LpaL13_11_+_169242-172196_ORF439 [370-375]
IQPQFVK	1	LpaL13_11_+_169242-172196_ORF439	LpaL13_11_+_169242-172196_ORF439 [525-531]
LYLDNSTGNMK	3	LpaL13_16_-_162176-163603_ORF1152	LpaL13_16_-_162176-163603_ORF1152 [189-199]	Leishmania_panamensis_strain_MHOM/PA/94/PSC-1 (405/405 (100%))	Leishmania_braziliensis_MHOM/BR/75/M2904_2019 (402/405 (99%))	Novel	Dihydroorotase protein
VNPPIRPPQHHEALWAGLLDGTVDCISTDHAPHTIAEK	1	LpaL13_16_-_162176-163603_ORF1152	LpaL13_16_-_162176-163603_ORF1152 [322-359]
TPLHLAHVSTAQSLDLVR	5	LpaL13_16_-_162176-163603_ORF1152	LpaL13_16_-_162176-163603_ORF1152 [269-286]
RPAESEVASVQEAIALAR	1	LpaL13_16_-_162176-163603_ORF1152	LpaL13_16_-_162176-163603_ORF1152 [248-265]
IFDLDCEWTVHGK	5	LpaL13_16_-_162176-163603_ORF1152	LpaL13_16_-_162176-163603_ORF1152 [439-451]
LLHTNPNR	2	LpaL13_16_-_162176-163603_ORF1152	LpaL13_16_-_162176-163603_ORF1152 [419-426]
SSQPVVEK	1	LpaL13_16_-_162176-163603_ORF1152	LpaL13_16_-_162176-163603_ORF1152 [200-207]
THCCGLK	1	LpaL13_16_-_162176-163603_ORF1152	LpaL13_16_-_162176-163603_ORF1152 [182-188]
PYCMHHQVK	4	LpaL13_11_+_169242-172196_ORF439	LpaL13_11_+_169242-172196_ORF439 [741-749]	Leishmania panamensis strain MHOM/PA/94/PSC-1_LPMP_110590	Leishmania braziliensis MHOM/BR/75/M2904 2019_LbrM.11.2.000360	Novel	Hypothetical protein; domain: PAZ and PIWI (PAZ after the proteins Piwi Argonaut and Zwille)
ERFARGSIVSQMAVVDLTRNVPQMITQQVAAK	2	LpaL13_11_+_169242-172196_ORF439	LpaL13_11_+_169242-172196_ORF439 [646-677]
PYCMHHQVK	2	LpaL13_11_+_169242-172196_ORF439	LpaL13_11_+_169242-172196_ORF439 [741-749]
RKYDAIIDPTLPMLYCVFADRTK	1	LpaL13_11_+_169242-172196_ORF439	LpaL13_11_+_169242-172196_ORF439 [439-461]
LEEERLLEAQRTAQEREAAQAEK	2	LpaL13_24_-_821238-822446_ORF41	LpaL13_24_-_821238-822446_ORF41 [291-313]	Leishmania panamensis strain MHOM/PA/94/PSC-1_LPMP_242300	Leishmania braziliensis MHOM/BR/75/M2903_LBRM2903_240031700	Novel	Hypothetical protein
RHELRSQKK	1	LpaL13_24_-_821238-822446_ORF41	LpaL13_24_-_821238-822446_ORF41 [165-173]
YLPIALRK	2	LpaL13_32_-_1150263-1150862_ORF1236	LpaL13_32_-_1150263-1150862_ORF1236 [125-132]	Leishmania panamensis strain MHOM/PA/94/PSC-1_LPMP_323150	Leishmania braziliensis MHOM/BR/75/M2904 2019_LbrM.32.2.003250	Novel	Hypothetical protein
DVSDSLALQK	1	LpaL13_32_-_1150263-1150862_ORF1236	LpaL13_32_-_1150263-1150862_ORF1236 [133-142]
